# Supplementary material
Source: PubMed Central journal article supplement (PMC3200031)
Supplement: ci200260t_si_001.pdf [file ci200260t_si_001.pdf]

# Mining the ChEMBL database: An efficient chemoinformatics workflow for assembling an ion channel-focused screening library

*N. Yi Mok and Ruth Brenk*

Drug Discovery Unit, College of Life Sciences, Sir James Black Centre, University of Dundee, Dundee  
DD1 5EH, UK

## Contents

|          |                                                   |     |
|----------|---------------------------------------------------|-----|
| Table S1 | Structures of shortlisted bioactive templates     | S2  |
| Table S2 | SMARTS strings of shortlisted bioactive templates | S12 |

**Table S1.** Structures of bioactive templates shortlisted for commercial availability search within each ion channel category. Structures shown represent the substructures used for mapping. Templates which did not retrieve any commercially available compounds are shaded in grey.

Category: AnionicCysLoop

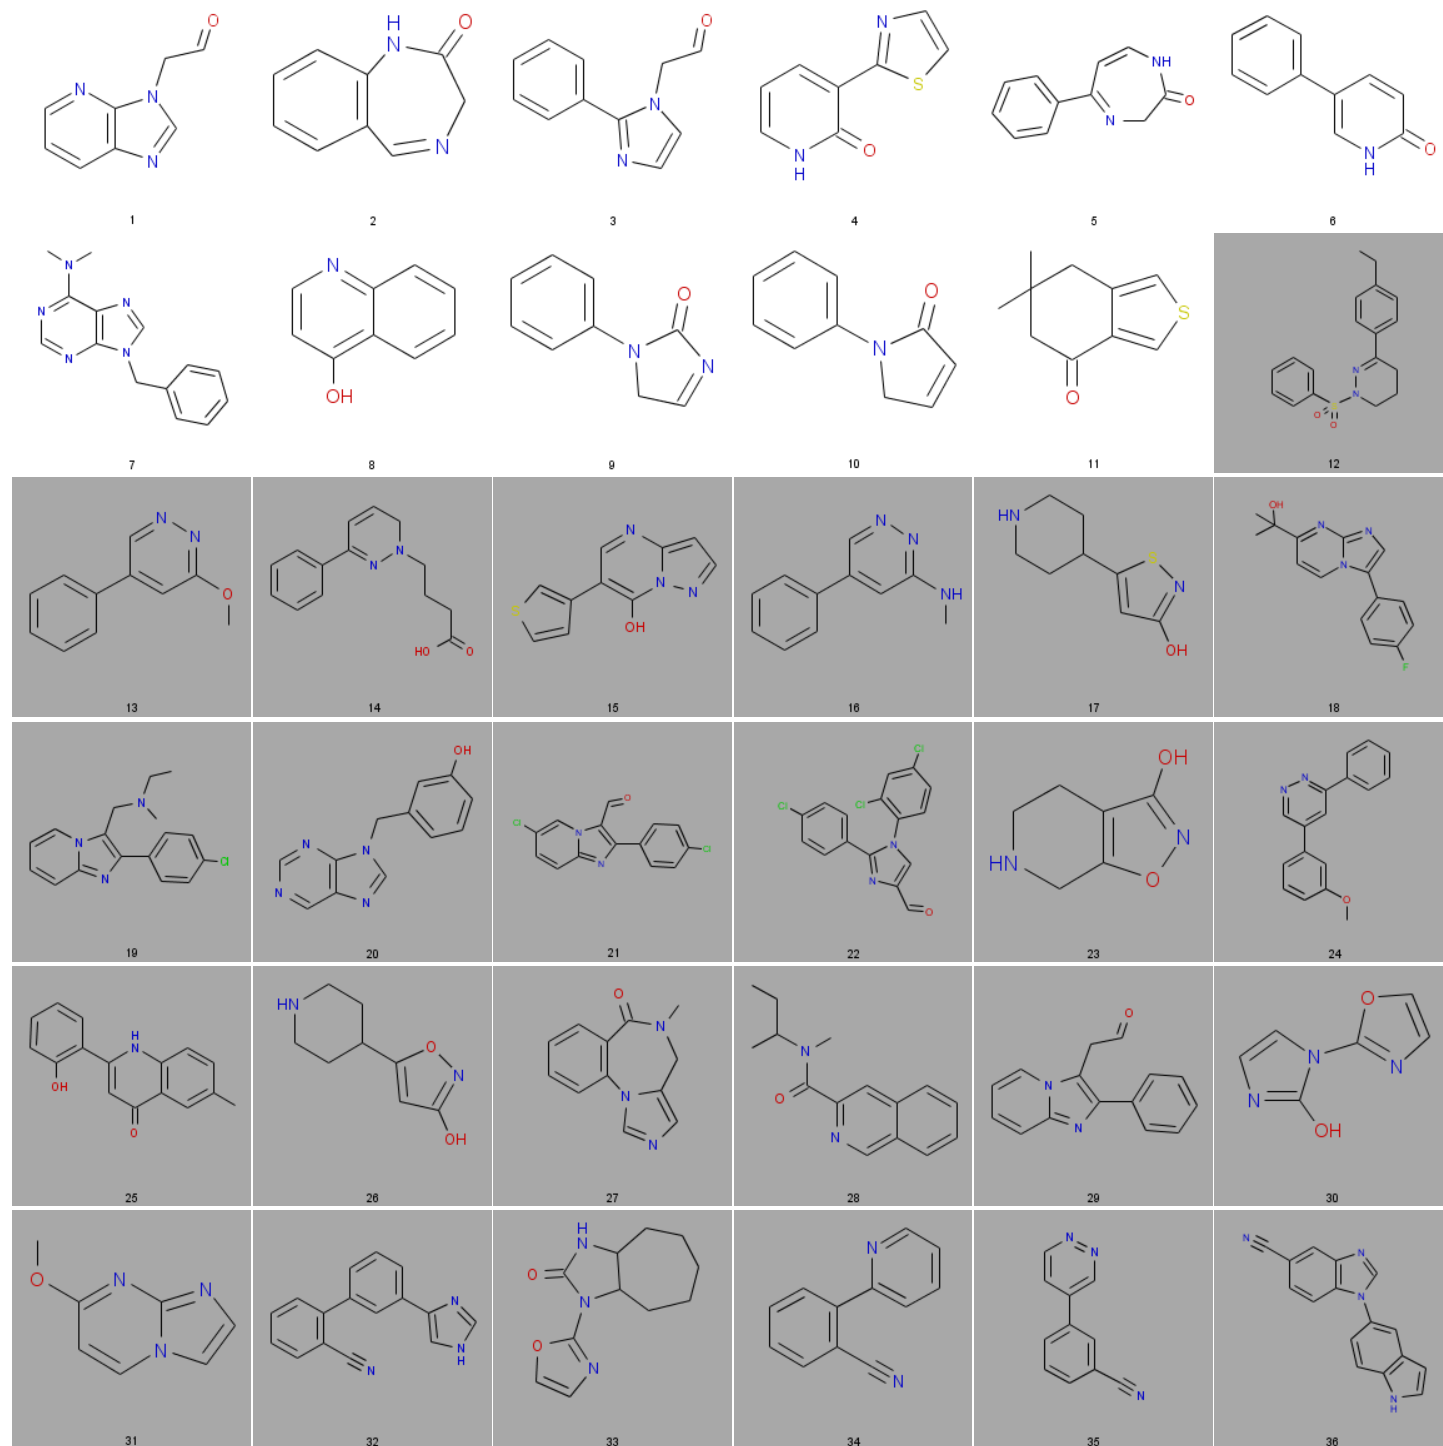

Category: Ca<sup>2+</sup>

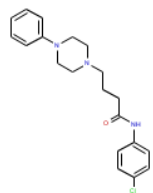

37

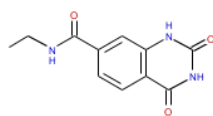

38

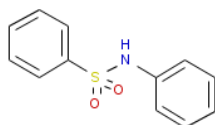

39

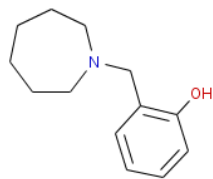

40

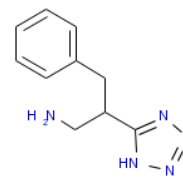

41

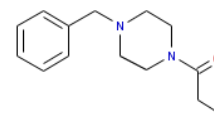

42

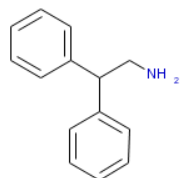

43

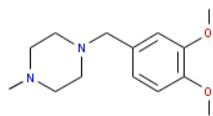

44

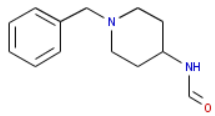

45

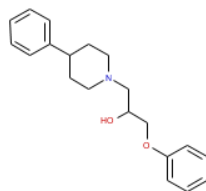

46

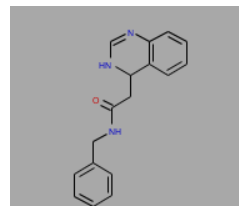

47

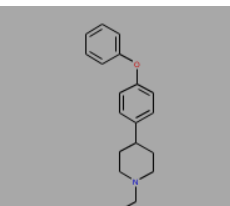

48

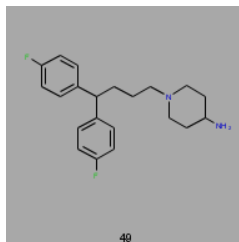

49

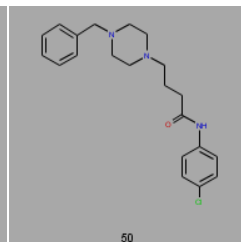

50

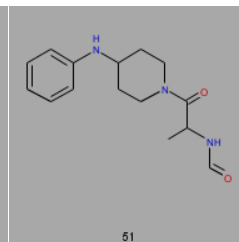

51

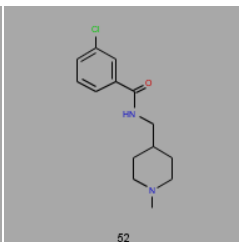

52

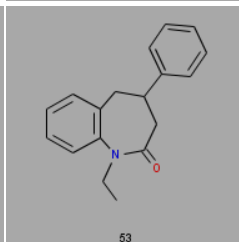

53

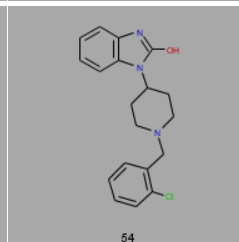

54

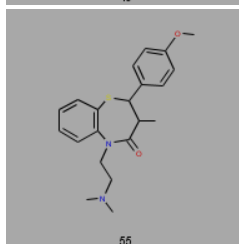

55

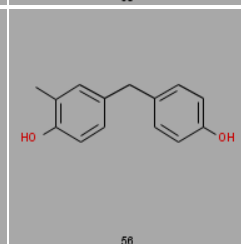

56

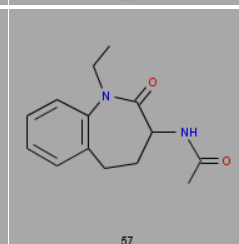

57

Category: CationicCysLoop

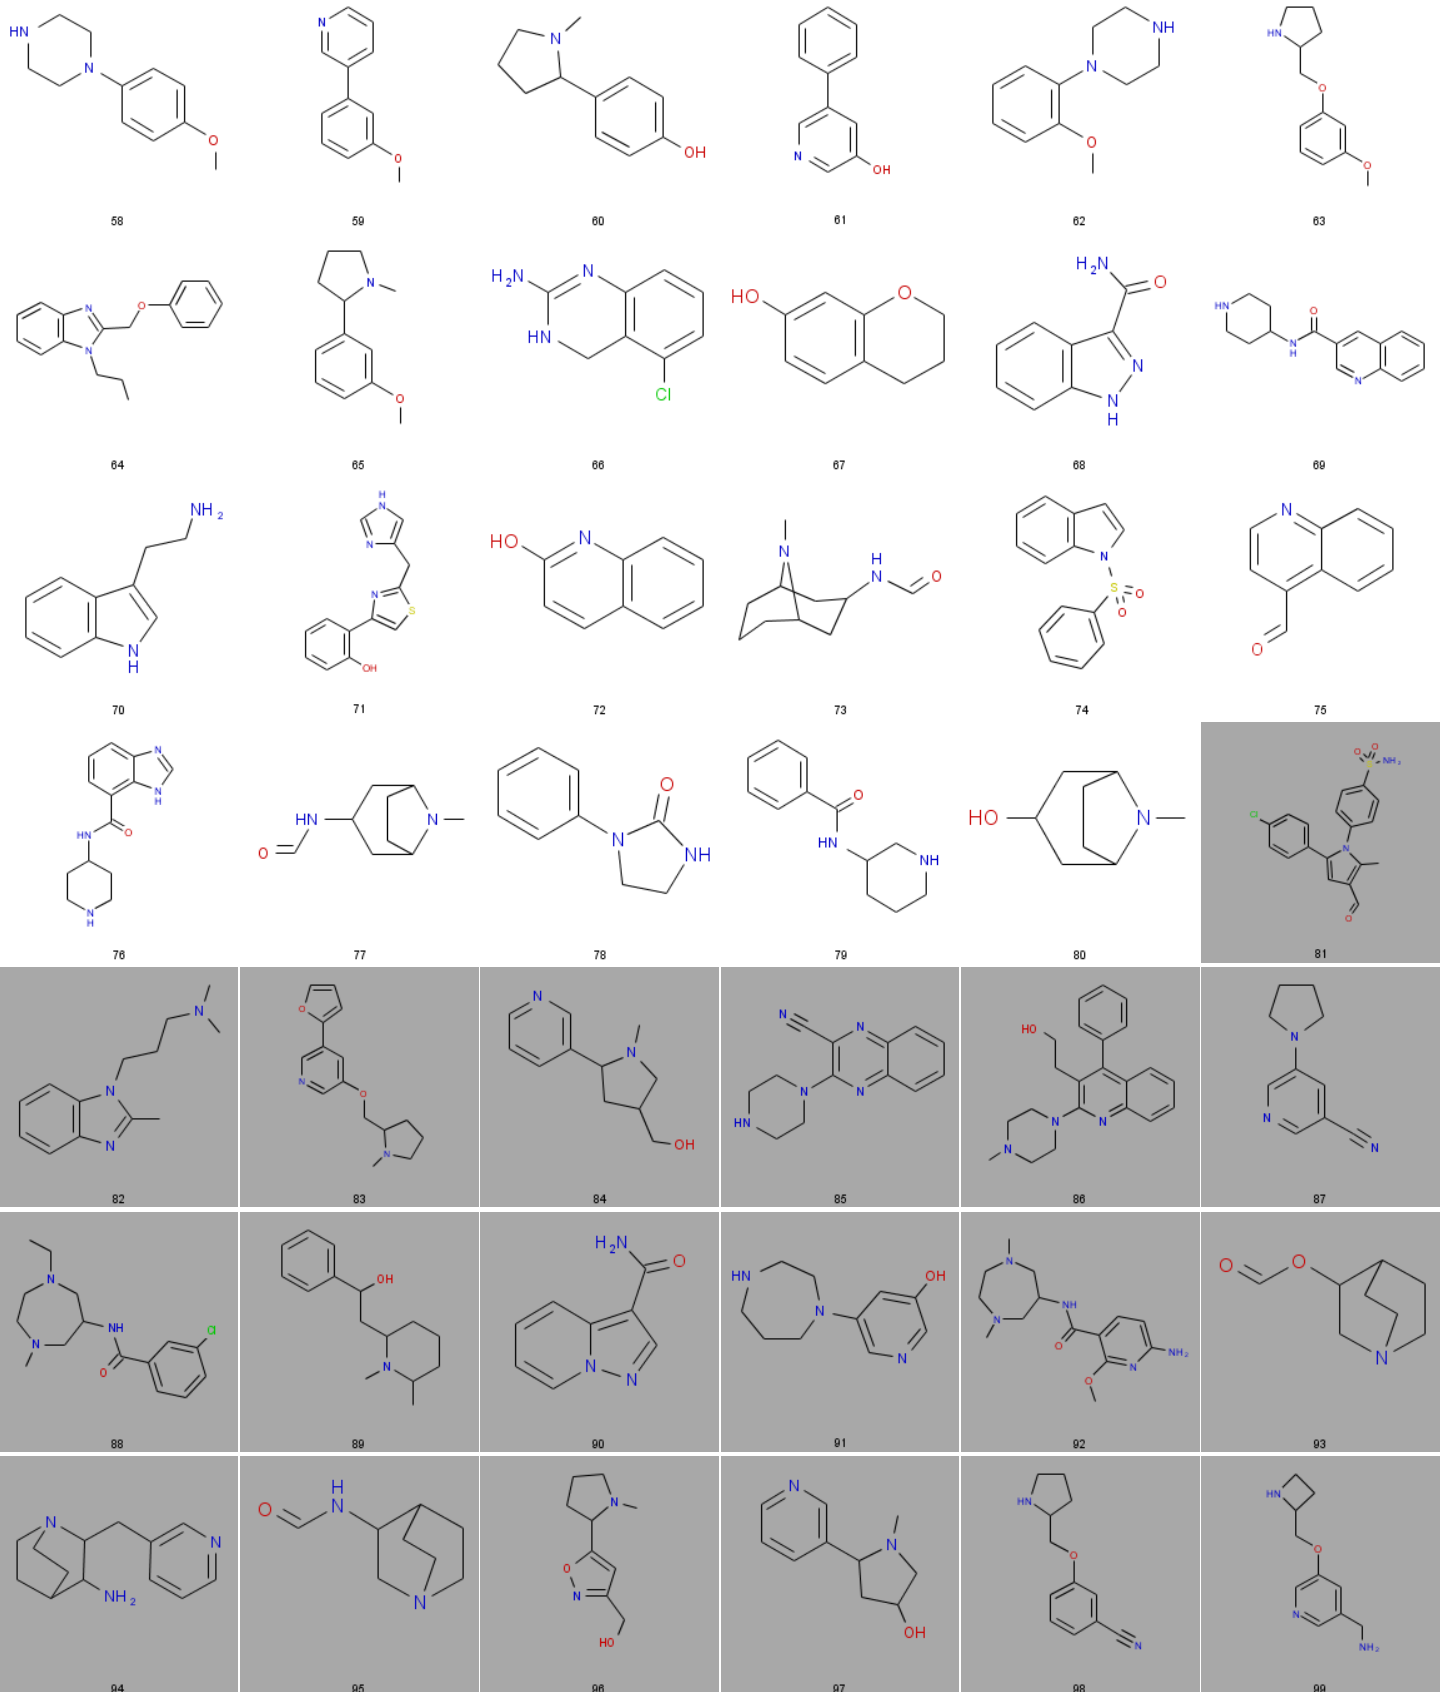

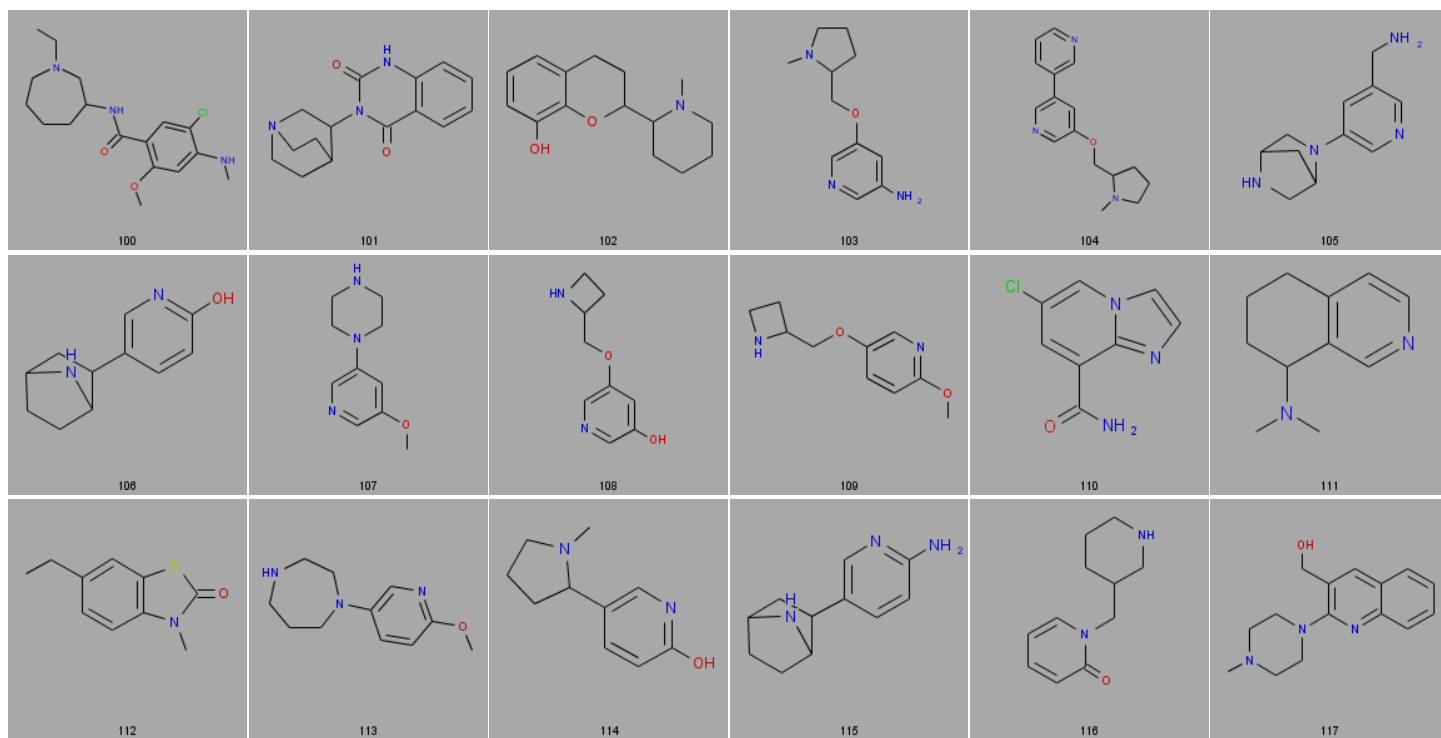

Category: Glutamate

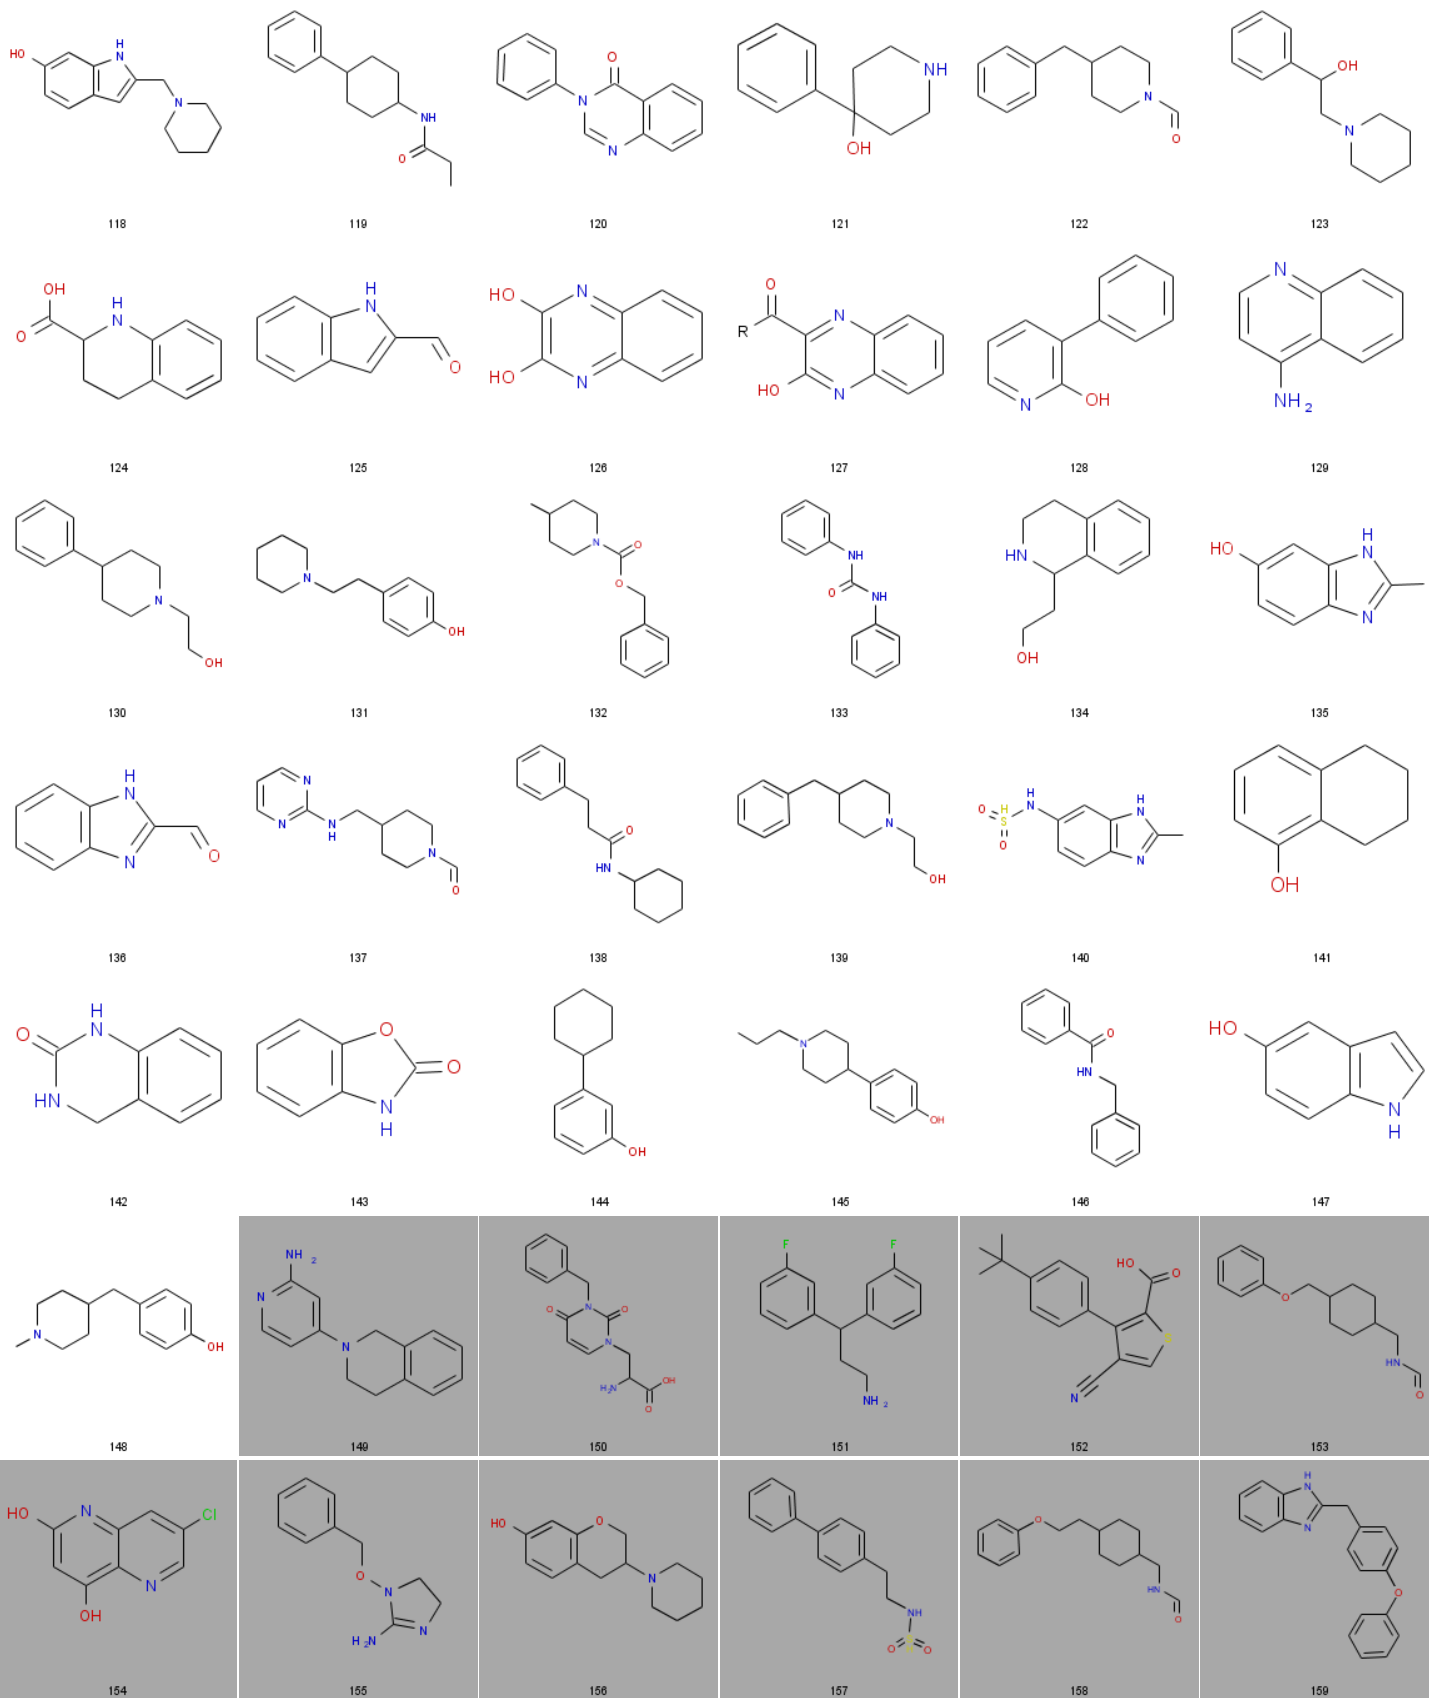

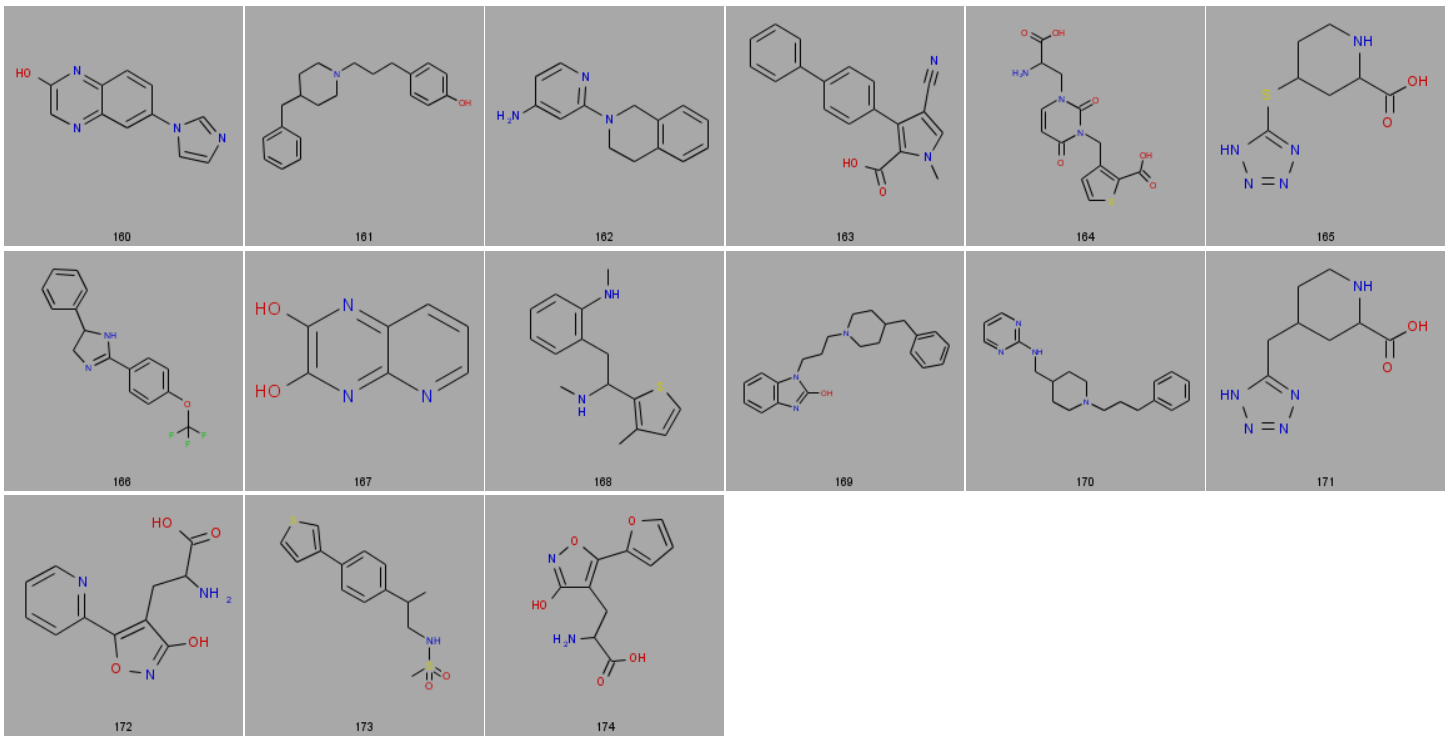

Category: InwardlyRectifyingK<sup>+</sup>

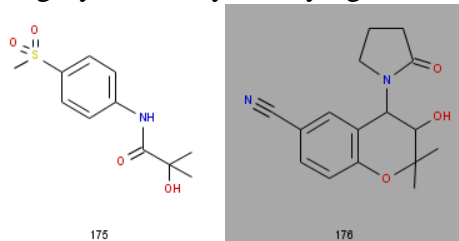

Category: K<sup>+</sup>

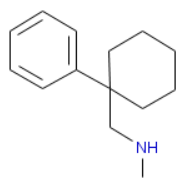

177

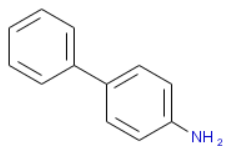

178

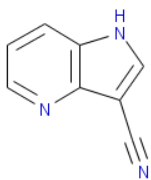

179

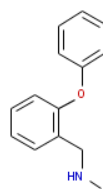

180

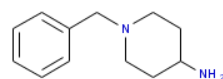

181

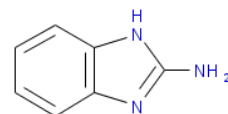

182

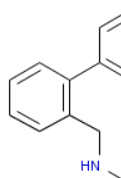

183

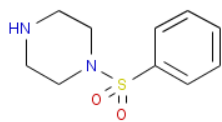

184

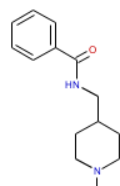

185

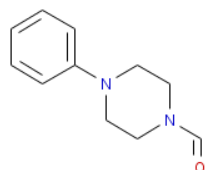

186

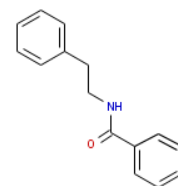

187

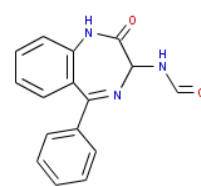

188

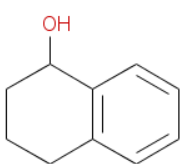

189

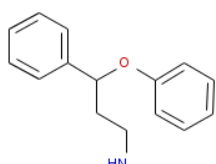

190

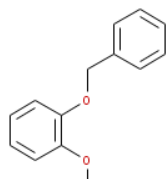

191

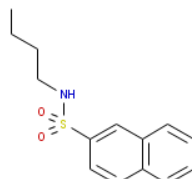

192

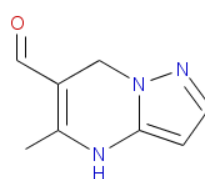

193

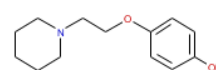

194

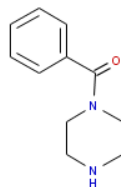

195

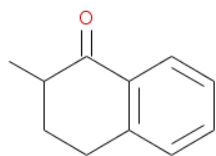

196

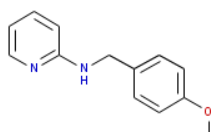

197

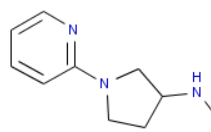

198

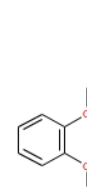

199

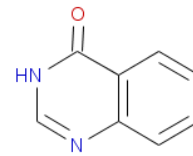

200

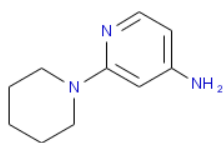

201

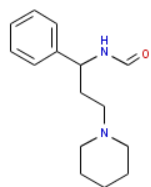

202

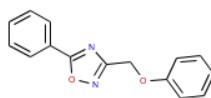

203

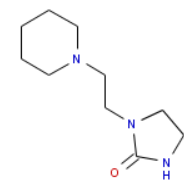

204

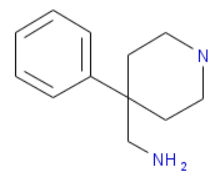

205

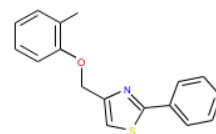

206

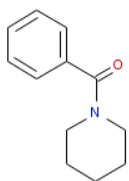

207

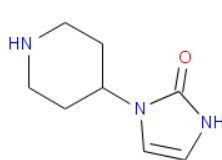

208

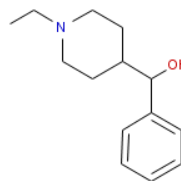

209

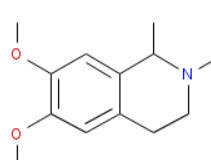

210

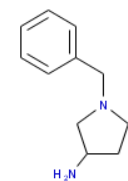

211

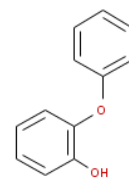

212

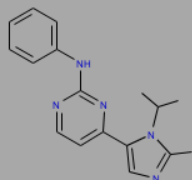

213

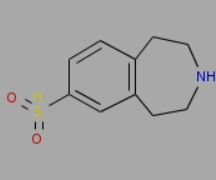

214

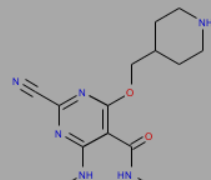

215

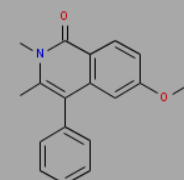

216

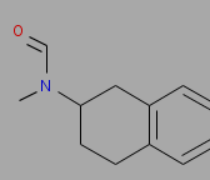

217

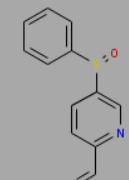

218



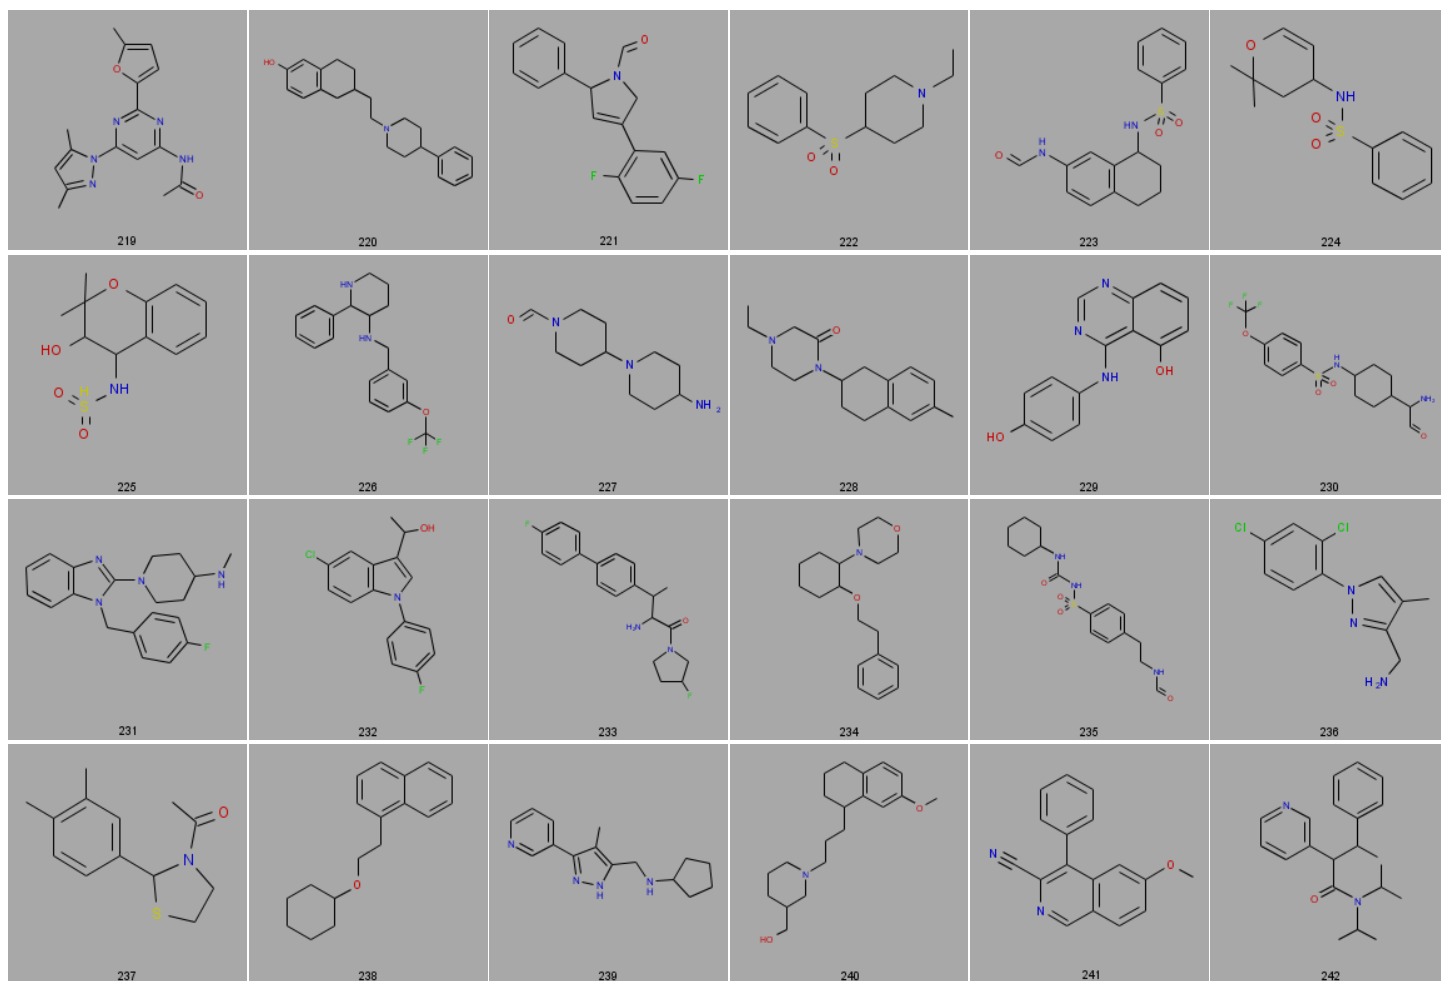

Category: Na<sup>+</sup>

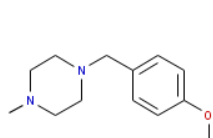

243

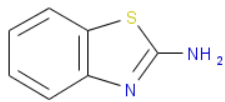

244

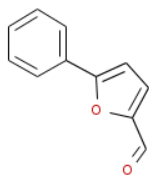

245

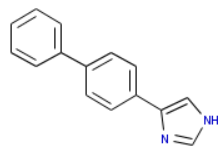

246

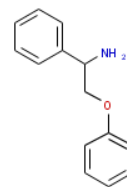

247

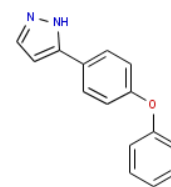

248

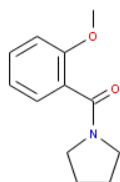

249

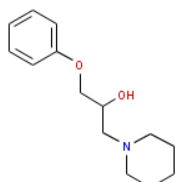

250

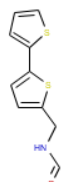

251

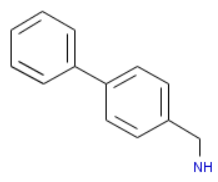

252

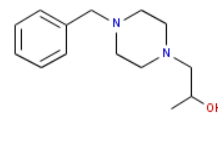

253

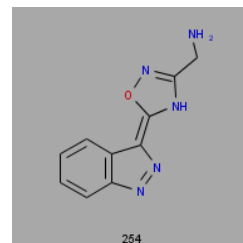

254

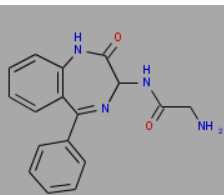

255

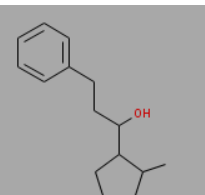

256

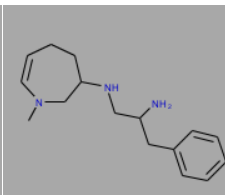

257

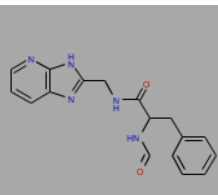

258

Category: Purinoceptors

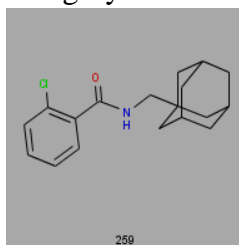

259

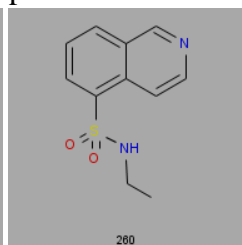

260

Category: Sulfonylurea

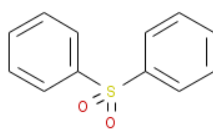

261

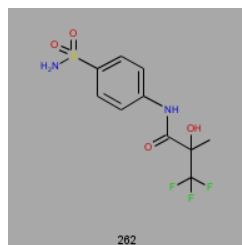

262

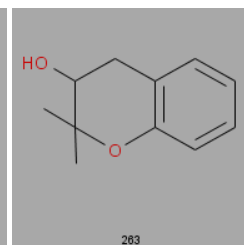

263

Category: Transient receptor potential

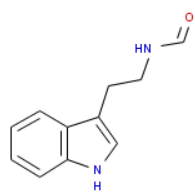

264

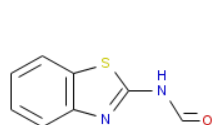

265

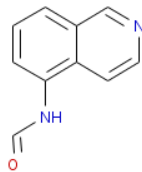

266

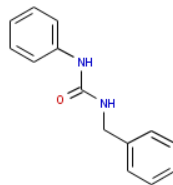

267

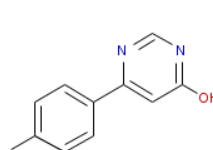

268

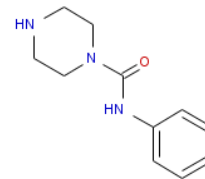

269

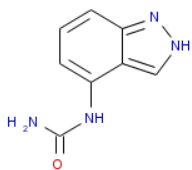

270

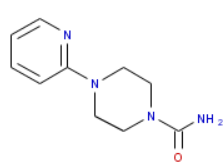

271

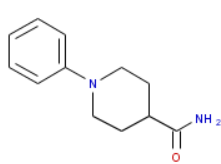

272

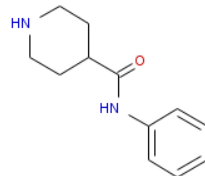

273

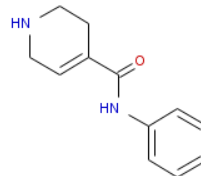

274

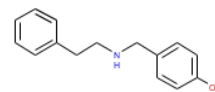

275

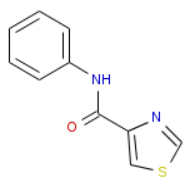

276

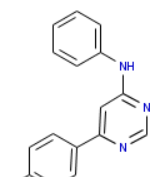

277

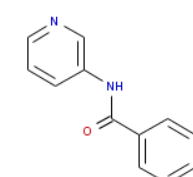

278

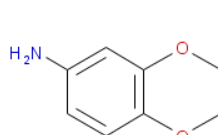

279

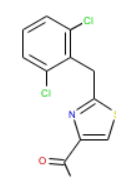

280

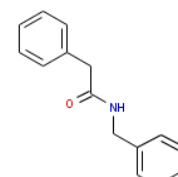

281

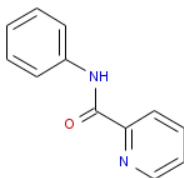

282

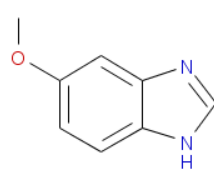

283

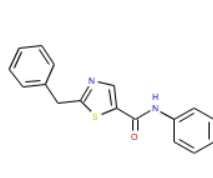

284

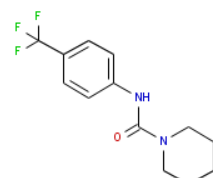

285

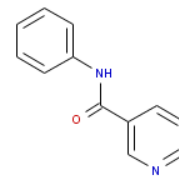

286

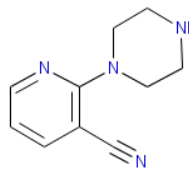

287

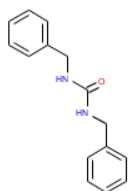

288

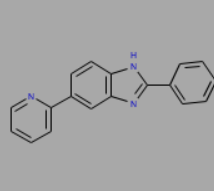

289

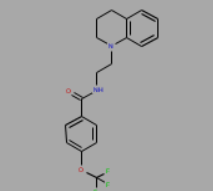

290

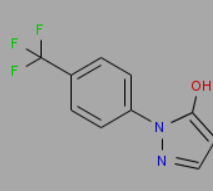

291

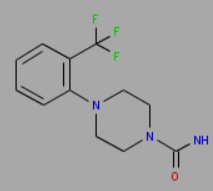

292

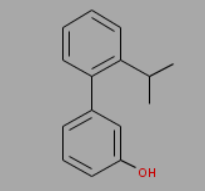

293

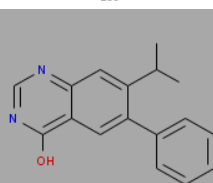

294

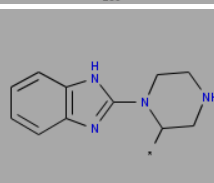

295

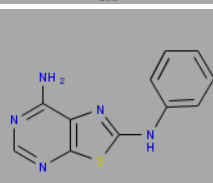

296

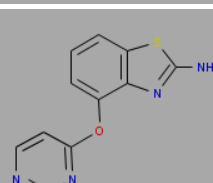

297

**Table S2.** SMARTS strings of bioactive templates shortlisted.

Category: AnionicCysLoop

| Template_ID | TEMPLATE_SMARTS                                                                                                                                          |
|-------------|----------------------------------------------------------------------------------------------------------------------------------------------------------|
| 1           | [O;R0]=[C;R0][C;R0][n;R]1:[c;R]:[n;R]:[c;R]2:[c;R]:[c;R]:[c;R]:[n;R]:[c;R]:1:2                                                                           |
| 2           | [O;R0]=[C;R]1[C;R][N;R]=[C;R][c;R]2:[c;R]:[c;R]:[c;R]:[c;R]:[c;R]:2[N;R]1                                                                                |
| 3           | [O;R0]=[C;R0][C;R0][n;R]1:[c;R]:[c;R]:[n;R]:[c;R]:1-[c;R]2:[c;R]:[c;R]:[c;R]:[c;R]:2                                                                     |
| 4           | [O;R0]=[C;R]1[N;R][C;R]=[C;R][C;R]=[C;R]1[c;R]2:[n;R]:[c;R]:[c;R]:[s;R]:2                                                                                |
| 5           | [O;R0]=[C;R]1[C;R][N;R]=[C;R]([c;R]2:[c;R]:[c;R]:[c;R]:[c;R]:2)[c;R]:[c;R][N;R]1                                                                         |
| 6           | [O;R0]=[C;R]1[N;R][C;R]=[C;R]([c;R]2:[c;R]:[c;R]:[c;R]:[c;R]:2)[C;R]=[C;R]1                                                                              |
| 7           | [N;R0]([c;R]1:[c;R]2:[n;R]:[c;R]:[n;R]([C;R0][c;R]3:[c;R]:[c;R]:[c;R]:[c;R]:3):[c;R]2:[n;R]:[c;R]:[n;R]1)([C;R0])[C;R0]                                  |
| 8           | [O;R0][c;R]1:[c;R]:[c;R]:[n;R]:[c;R]2:[c;R]:[c;R]:[c;R]:[c;R]:1:2                                                                                        |
| 9           | [O;R0]=[C;R]1[N;R]=[C;R][C;R][N;R]1[c;R]2:[c;R]:[c;R]:[c;R]:[c;R]:2                                                                                      |
| 10          | [O;R0]=[C;R]1[C;R]=[C;R][C;R][N;R]1[c;R]2:[c;R]:[c;R]:[c;R]:[c;R]:2                                                                                      |
| 11          | [O;R0]=[C;R]1[C;R][C;R]([C;R][c;R]2:[c;R]:[s;R]:[c;R]:[c;R]1:2)([C;R0])[C;R0]                                                                            |
| 12          | [O;R0]=[S;R0]([N;R]1[N;R]=[C;R]([c;R]2:[c;R]:[c;R]:[c;R]([C;R0][C;R0]):[c;R]:[c;R]:2)[C;R][C;R][C;R]1)(=[O;R0])[c;R]3:[c;R]:[c;R]:[c;R]:[c;R]:3          |
| 13          | [O;R0]([C;R0])[c;R]1:[c;R]:[c;R](:[c;R]:[n;R]:[n;R]:1)-[c;R]2:[c;R]:[c;R]:[c;R]:[c;R]:2                                                                  |
| 14          | [O;R0][C;R0]([C;R0][C;R0][C;R0][N;R]1[N;R]=[C;R]([C;R]=[C;R][C;R]1)[c;R]2:[c;R]:[c;R]:[c;R]:[c;R]:[c;R]:2)=[O;R0]                                        |
| 15          | [O;R0][C;R]1=[C;R]([C;R]=[N;R][c;R]2:[c;R]:[c;R]:[n;R]:[n;R]1:2)[c;R]3:[c;R]:[c;R]:[s;R]:[c;R]:3                                                         |
| 16          | [N;R0]([C;R0])[c;R]1:[c;R]:[c;R](:[c;R]:[n;R]:[n;R]:1)-[c;R]2:[c;R]:[c;R]:[c;R]:[c;R]:2                                                                  |
| 17          | [O;R0][c;R]1:[c;R]:[c;R](:[s;R]:[n;R]:1)[C;R]2[C;R][C;R][N;R][C;R][C;R]2                                                                                 |
| 18          | [O;R0][C;R0]([C;R0])([C;R0])[C;R]1[C;R]=[C;R][n;R]2:[c;R](:[c;R]:[n;R]:[c;R]:2[N;R]=1)-[c;R]3:[c;R]:[c;R]:[c;R]([F;R0]):[c;R]:[c;R]:3                    |
| 19          | [N;R0]([C;R0][C;R0])([C;R0])[C;R0][c;R]1:[c;R](:[n;R]:[c;R]2[C;R]=[C;R][C;R]=[C;R][n;R]:1:2)-[c;R]3:[c;R]:[c;R]:[c;R]([Cl;R0]):[c;R]:[c;R]:3             |
| 20          | [O;R0][c;R]1:[c;R]:[c;R]:[c;R]:[c;R]([C;R0][n;R]2:[c;R]:[n;R]:[c;R]3:[c;R]:[n;R]:[c;R]:[n;R]:[c;R]:2:3):[c;R]:1                                          |
| 21          | [O;R0]=[C;R0][c;R]1:[c;R](:[n;R]:[c;R]2[C;R]=[C;R][C;R]([Cl;R0]=[C;R][n;R]:1:2)-[c;R]3:[c;R]:[c;R]:[c;R]([Cl;R0]):[c;R]:[c;R]:3                          |
| 22          | [O;R0]=[C;R0][c;R]1:[c;R]:[n;R](-[c;R]2:[c;R]:[c;R]:[c;R]([Cl;R0]):[c;R]:[c;R]:2[Cl;R0]):[c;R](:[n;R]:1)-[c;R]3:[c;R]:[c;R]:[c;R]([Cl;R0]):[c;R]:[c;R]:3 |
| 23          | [O;R0][c;R]1:[n;R]:[o;R]:[c;R]2[C;R][N;R][C;R][C;R][c;R]:1:2                                                                                             |

| Template_ID | TEMPLATE_SMARTS                                                                                                                                    |
|-------------|----------------------------------------------------------------------------------------------------------------------------------------------------|
| 24          | [O;R0]([C;R0])[c;R]1:[c;R]:[c;R]:[c;R]:[c;R]:[c;R]:([c;R]:1)-[c;R]2:[c;R]:[n;R]:[n;R]:[c;R]:[c;R]:([c;R]:2)-[c;R]3:[c;R]:[c;R]:[c;R]:[c;R]:[c;R]:3 |
| 25          | [O;R0]=[C;R]1[C;R]=[C;R]([N;R][c;R]2:[c;R]:[c;R]:[c;R]([C;R0]):[c;R]:[c;R]1:2)[c;R]3:[c;R]:[c;R]:[c;R]:[c;R]:[c;R]:3[O;R0]                         |
| 26          | [O;R0][c;R]1:[c;R]:[c;R]:([o;R]:[n;R]:1)[C;R]2[C;R][C;R][N;R][C;R][C;R]2                                                                           |
| 27          | [O;R0]=[C;R]1[N;R]([C;R][c;R]2:[n;R]:[c;R]:[n;R]:[c;R]:2)-[c;R]3:[c;R]:[c;R]:[c;R]:[c;R]:[c;R]1:3[C;R0]                                            |
| 28          | [N;R0]([C;R0]([C;R0][C;R0])[C;R0])([C;R0][C;R0]=[O;R0])[c;R]1:[c;R]:[c;R]2:[c;R]:[c;R]:[c;R]:[c;R]:[c;R]:2:[c;R]:[n;R]:1                           |
| 29          | [O;R0]=[C;R0][C;R0][c;R]1:[c;R]:([n;R]:[c;R]2[C;R]=[C;R][C;R]=[C;R][n;R]:1:2)-[c;R]3:[c;R]:[c;R]:[c;R]:[c;R]:[c;R]:3                               |
| 30          | [O;R0][c;R]1:[n;R]:[c;R]:[c;R]:[n;R]:1-[c;R]2:[o;R]:[c;R]:[c;R]:[n;R]:2                                                                            |
| 31          | [O;R0]([C;R]1=[N;R][c;R]2:[n;R]:[c;R]:[c;R]:[n;R]:2[C;R]=[C;R]1)[C;R0]                                                                             |
| 32          | [N;R0]#[C;R0][c;R]1:[c;R]:[c;R]:[c;R]:[c;R]:[c;R]:[c;R]:1-[c;R]2:[c;R]:[c;R]:[c;R]:[c;R](-[c;R]3:[n;R]:[c;R]:[n;R]:[c;R]:3):[c;R]:2                |
| 33          | [O;R0]=[C;R]1[N;R][C;R]2[C;R][C;R][C;R][C;R][C;R]2[N;R]1[c;R]3:[o;R]:[c;R]:[c;R]:[n;R]:3                                                           |
| 34          | [N;R0]#[C;R0][c;R]1:[c;R]:[c;R]:[c;R]:[c;R]:[c;R]:[c;R]:1-[c;R]2:[n;R]:[c;R]:[c;R]:[c;R]:[c;R]:2                                                   |
| 35          | [N;R0]#[C;R0][c;R]1:[c;R]:[c;R]:[c;R]:[c;R](-[c;R]2:[c;R]:[c;R]:[n;R]:[n;R]:[c;R]:2):[c;R]:1                                                       |
| 36          | [N;R0]#[C;R0][c;R]1:[c;R]:[c;R]:[c;R]2:[c;R]:([c;R]:1):[n;R]:[c;R]:[n;R]:2-[c;R]3:[c;R]:[c;R]:[c;R]4:[n;R]:[c;R]:[c;R]:[c;R]:4:[c;R]:3             |

Category: Ca<sup>2+</sup>

| Template_ID | TEMPLATE_SMARTS                                                                                                                                         |
|-------------|---------------------------------------------------------------------------------------------------------------------------------------------------------|
| 37          | [N;R0]([c;R]1:[c;R]:[c;R]:[c;R]([C;R0]):[c;R]:[c;R]:1)[C;R0]=[O;R0][C;R0][C;R0][C;R0][N;R]2[C;R][C;R][N;R]([C;R][C;R]2)[c;R]3:[c;R]:[c;R]:[c;R]:[c;R]:3 |
| 38          | [O;R0]=[C;R0]([N;R0][C;R0][C;R0])[c;R]1:[c;R]:[c;R]:[c;R]2[C;R]=[O;R0][N;R][C;R]([=O;R0][N;R][c;R]:2:[c;R]:1                                            |
| 39          | [O;R0]=[S;R0]([N;R0][c;R]1:[c;R]:[c;R]:[c;R]:[c;R]:[c;R]:1)=[O;R0][c;R]2:[c;R]:[c;R]:[c;R]:[c;R]:[c;R]:2                                                |
| 40          | [O;R0][c;R]1:[c;R]:[c;R]:[c;R]:[c;R]:[c;R]:1[C;R0][N;R]2[C;R][C;R][C;R][C;R][C;R]2                                                                      |
| 41          | [N;R0][C;R0][C;R0]([C;R0][c;R]1:[c;R]:[c;R]:[c;R]:[c;R]:[c;R]:1)[c;R]2:[n;R]:[n;R]:[n;R]:[n;R]:2                                                        |
| 42          | [O;R0]=[C;R0]([N;R]1[C;R][C;R][N;R]([C;R0][c;R]2:[c;R]:[c;R]:[c;R]:[c;R]:2)[C;R][C;R]1)[C;R0][C;R0]                                                     |
| 43          | [N;R0][C;R0][C;R0]([c;R]1:[c;R]:[c;R]:[c;R]:[c;R]:[c;R]:1)[c;R]2:[c;R]:[c;R]:[c;R]:[c;R]:[c;R]:2                                                        |
| 44          | [O;R0]([C;R0])[c;R]1:[c;R]:[c;R]:[c;R]([C;R0][N;R]2[C;R][C;R][N;R]([C;R][C;R]2)[C;R0]):[c;R]:[c;R]:1[O;R0][C;R0]                                        |
| 45          | [O;R0]=[C;R0][N;R0][C;R]1[C;R][C;R][N;R]([C;R0][c;R]2:[c;R]:[c;R]:[c;R]:[c;R]:[c;R]:2)[C;R][C;R]1                                                       |
| 46          | [O;R0][C;R0]([C;R0][O;R0][c;R]1:[c;R]:[c;R]:[c;R]:[c;R]:[c;R]:1)[C;R0][N;R]2[C;R][C;R][C;R]([C;R][C;R]2)[c;R]3:[c;R]:[c;R]:[c;R]:[c;R]:[c;R]:3          |
| 47          | [O;R0]=[C;R0]([C;R0][C;R]1[N;R][C;R]=[N;R][c;R]2:[c;R]:[c;R]:[c;R]:[c;R]:[c;R]:1:2)[N;R0][C;R0][c;R]3:[c;R]:[c;R]:[c;R]:[c;R]:[c;R]:3                   |

| Template_ID | TEMPLATE_SMARTS                                                                                                                                                         |
|-------------|-------------------------------------------------------------------------------------------------------------------------------------------------------------------------|
| 48          | [O;R0]([c;R]1:[c;R]:[c;R]:[c;R]([C;R]2[C;R][C;R][N;R]([C;R0][C;R0])[C;R][C;R]2):[c;R]:[c;R]:1)[c;R]3:[c;R]:[c;R]:[c;R]:[c;R]:[c;R]:3                                    |
| 49          | [N;R0][C;R]1[C;R][C;R][N;R]([C;R][C;R]1)[C;R0][C;R0][C;R0][C;R0]([C;R]2:[c;R]:[c;R]:[c;R]([F;R0]):[c;R]:[c;R]:2)[c;R]3:[c;R]:[c;R]:[c;R]([F;R0]):[c;R]:[c;R]:3          |
| 50          | [N;R0]([c;R]1:[c;R]:[c;R]:[c;R]([Cl;R0]):[c;R]:[c;R]:1)[C;R0](=[O;R0])[C;R0][C;R0][C;R0][N;R]2[C;R][C;R][N;R]([C;R0][c;R]3:[c;R]:[c;R]:[c;R]:[c;R]:[c;R]:3)[C;R][C;R]2  |
| 51          | [O;R0]=[C;R0][N;R0][C;R0]([C;R0]([N;R]1[C;R][C;R][C;R]([N;R0][c;R]2:[c;R]:[c;R]:[c;R]:[c;R]:[c;R]:2)[C;R][C;R]1)=O;R0)[C;R0]                                            |
| 52          | [O;R0]=[C;R0]([N;R0][C;R0][C;R]1[C;R][C;R][N;R]([C;R0])[C;R][C;R]1)[c;R]2:[c;R]:[c;R]:[c;R]:[c;R]([Cl;R0]):[c;R]:2                                                      |
| 53          | [O;R0]=[C;R]1[N;R]([c;R]2:[c;R]:[c;R]:[c;R]:[c;R]:[c;R]:2[C;R][C;R]([c;R]3:[c;R]:[c;R]:[c;R]:[c;R]:[c;R]:3)[C;R]1)[C;R0][C;R0]                                          |
| 54          | [O;R0][c;R]1:[n;R]([C;R]2[C;R][C;R][N;R]([C;R0][c;R]3:[c;R]:[c;R]:[c;R]:[c;R]:[c;R]:3[Cl;R0])[C;R][C;R]2):[c;R]4:[c;R]:[c;R]:[c;R]:[c;R]:[c;R]:[c;R]:1                  |
| 55          | [N;R0]([C;R0][C;R0][N;R]1[c;R]2:[c;R]:[c;R]:[c;R]:[c;R]:[c;R]:2[S;R][C;R]([c;R]3:[c;R]:[c;R]:[c;R]([O;R0][C;R0]):[c;R]:[c;R]:3)[C;R]([C;R]1=[O;R0])[C;R0]([C;R0])[C;R0] |
| 56          | [O;R0][c;R]1:[c;R]:[c;R]:[c;R]([C;R0][c;R]2:[c;R]:[c;R]:[c;R]([O;R0]):[c;R]([C;R0]):[c;R]:2):[c;R]:[c;R]:1                                                              |
| 57          | [O;R0]=[C;R0]([N;R0][C;R]1[C;R]([N;R]([c;R]2:[c;R]:[c;R]:[c;R]:[c;R]:[c;R]:2[C;R][C;R]1)[C;R0][C;R0])=O;R0)[C;R0]                                                       |

### Category: CationicCysLoop

| Template_ID | TEMPLATE_SMARTS                                                                                                               |
|-------------|-------------------------------------------------------------------------------------------------------------------------------|
| 58          | [O;R0]([C;R0])[c;R]1:[c;R]:[c;R]:[c;R](:[c;R]:[c;R]:1)[N;R]2[C;R][C;R][N;R][C;R][C;R]2                                        |
| 59          | [O;R0]([C;R0])[c;R]1:[c;R]:[c;R]:[c;R]:[c;R](:[c;R]:1)-[c;R]2:[c;R]:[n;R]:[c;R]:[c;R]:[c;R]:2                                 |
| 60          | [O;R0][c;R]1:[c;R]:[c;R]:[c;R](:[c;R]:[c;R]:1)[C;R]2[C;R][C;R][N;R]2[C;R0]                                                    |
| 61          | [O;R0][c;R]1:[c;R]:[n;R]:[c;R]:[c;R](:[c;R]:1)-[c;R]2:[c;R]:[c;R]:[c;R]:[c;R]:[c;R]:2                                         |
| 62          | [O;R0]([C;R0])[c;R]1:[c;R]:[c;R]:[c;R]:[c;R]:[c;R]:1[N;R]2[C;R][C;R][N;R][C;R][C;R]2                                          |
| 63          | [O;R0]([C;R0])[c;R]1:[c;R]:[c;R]:[c;R]:[c;R]([O;R0][C;R0][C;R]2[C;R][C;R][C;R][N;R]2):[c;R]:1                                 |
| 64          | [O;R0]([C;R0][c;R]1:[n;R]([C;R0][C;R0][C;R0]):[c;R]2:[c;R]:[c;R]:[c;R]:[c;R]:2:[n;R]:1)[c;R]3:[c;R]:[c;R]:[c;R]:[c;R]:[c;R]:3 |
| 65          | [O;R0]([C;R0])[c;R]1:[c;R]:[c;R]:[c;R]:[c;R](:[c;R]:1)[C;R]2[C;R][C;R][C;R][N;R]2[C;R0]                                       |
| 66          | [N;R0][C;R]1=[N;R][c;R]2:[c;R]:[c;R]:[c;R]:[c;R]([Cl;R0]):[c;R]:2[C;R][N;R]1                                                  |
| 67          | [O;R0][c;R]1:[c;R]:[c;R]:[c;R]2[C;R][C;R][C;R][O;R][c;R]:2:[c;R]:1                                                            |
| 68          | [N;R0][C;R0](=[O;R0])[c;R]1:[n;R]:[n;R]:[c;R]2:[c;R]:[c;R]:[c;R]:[c;R]:[c;R]:1:2                                              |
| 69          | [O;R0]=[C;R0]([N;R0][C;R]1[C;R][C;R][N;R][C;R][C;R]1)[c;R]2:[c;R]:[n;R]:[c;R]3:[c;R]:[c;R]:[c;R]:[c;R]:[c;R]:3:c;R:2          |
| 70          | [N;R0][C;R0][C;R0][c;R]1:[c;R]:[n;R]:[c;R]2:[c;R]:[c;R]:[c;R]:[c;R]:[c;R]:1:2                                                 |

| Template_ID | TEMPLATE_SMARTS                                                                                                                                                                 |
|-------------|---------------------------------------------------------------------------------------------------------------------------------------------------------------------------------|
| 71          | [O;R0][c;R]1:[c;R];[c;R];[c;R];[c;R];[c;R];[c;R];1-[c;R]2:[n;R];[c;R]([C;R0][c;R]3:[n;R];[c;R];[n;R];[c;R];3):[s;R];[c;R];2                                                     |
| 72          | [O;R0][c;R]1:[c;R];[c;R];[c;R]2:[c;R];[c;R];[c;R];[c;R];[c;R];[c;R];2:[n;R];1                                                                                                   |
| 73          | [O;R0]=[C;R0][N;R0][C;R]1[C;R][C;R]2[C;R][C;R][C;R][C;R]([N;R]2[C;R0])[C;R]1                                                                                                    |
| 74          | [O;R0]=[S;R0]([n;R]1:[c;R];[c;R];[c;R]2:[c;R];1:[c;R];[c;R];[c;R];[c;R];2)(=[O;R0])[c;R]3:[c;R];[c;R];[c;R];[c;R];[c;R];3                                                       |
| 75          | [O;R0]=[C;R0][c;R]1:[c;R];[c;R];[n;R];[c;R]2:[c;R];[c;R];[c;R];[c;R];[c;R];1:2                                                                                                  |
| 76          | [N;R]1[C;R][C;R][C;R]([N;R0][C;R0](=[O;R0])[c;R]2:[c;R];[c;R];[c;R];[c;R]3:[n;R];[c;R];[n;R];[c;R];3:2)[C;R][C;R]1                                                              |
| 77          | [O;R0]=[C;R0][N;R0][C;R]1[C;R][C;R]2[C;R][C;R][C;R]([N;R]2[C;R0])[C;R]1                                                                                                         |
| 78          | [O;R0]=[C;R]1[N;R][C;R][C;R][N;R]1[c;R]2:[c;R];[c;R];[c;R];[c;R];[c;R];2                                                                                                        |
| 79          | [O;R0]=[C;R0]([N;R0][C;R]1[C;R][N;R][C;R][C;R][C;R]1)[c;R]2:[c;R];[c;R];[c;R];[c;R];[c;R];2                                                                                     |
| 80          | [O;R0][C;R]1[C;R][C;R]2[C;R][C;R][C;R]([N;R]2[C;R0])[C;R]1                                                                                                                      |
| 81          | [O;R0]=[C;R0][c;R]1:[c;R]([C;R0]);[n;R](:[c;R](:[c;R]:1)-[c;R]2:[c;R];[c;R];[c;R]([C;R0]);[c;R];[c;R];2)-[c;R]3:[c;R];[c;R];[c;R](:[c;R];[c;R];3)[S;R0](=[O;R0])(=[O;R0])[N;R0] |
| 82          | [N;R0]([C;R0])([C;R0])[C;R0][C;R0][C;R0][n;R]1:[c;R]([C;R0]);[n;R];[c;R]2:[c;R];[c;R];[c;R];[c;R];[c;R];1:2                                                                     |
| 83          | [O;R0]([C;R0][C;R]1[C;R][C;R][C;R][N;R]1[C;R0])[c;R]2:[c;R];[n;R];[c;R];[c;R](:[c;R]:2)-[c;R]3:[o;R];[c;R];[c;R];[c;R];3                                                        |
| 84          | [O;R0][C;R0][C;R]1[C;R][N;R]([C;R0])[C;R]([C;R]1)[c;R]2:[c;R];[c;R];[c;R];[n;R];[c;R];2                                                                                         |
| 85          | [N;R0]#[C;R0][c;R]1:[n;R];[c;R]2:[c;R];[c;R];[c;R];[c;R];[c;R];2:[n;R];[c;R];1[N;R]3[C;R][C;R][N;R][C;R][C;R]3                                                                  |
| 86          | [O;R0][C;R0][C;R0][c;R]1:[c;R](:[c;R]2:[c;R];[c;R];[c;R];[c;R];[c;R];2:[n;R];[c;R];1[N;R]3[C;R][C;R][N;R]([C;R0])[C;R][C;R]3)-[c;R]4:[c;R];[c;R];[c;R];[c;R];[c;R];4            |
| 87          | [N;R0]#[C;R0][c;R]1:[c;R];[n;R];[c;R];[c;R](:[c;R]:1)[N;R]2[C;R][C;R][C;R][C;R]2                                                                                                |
| 88          | [O;R0]=[C;R0]([N;R0][C;R]1[C;R][N;R]([C;R][C;R][N;R]([C;R0][C;R0])[C;R]1)[C;R0])[c;R]2:[c;R];[c;R]([C;R0]);[c;R];[c;R];[c;R];2                                                  |
| 89          | [O;R0][C;R0]([C;R0][C;R]1[C;R][C;R][C;R][C;R]([N;R]1[C;R0])[C;R0])[c;R]2:[c;R];[c;R];[c;R];[c;R];[c;R];2                                                                        |
| 90          | [N;R0][C;R0](=[O;R0])[c;R]1:[c;R];[n;R];[n;R]2[C;R]=[C;R][C;R]=[C;R][c;R];1:2                                                                                                   |
| 91          | [O;R0][c;R]1:[c;R];[n;R];[c;R];[c;R](:[c;R]:1)[N;R]2[C;R][C;R][C;R][N;R][C;R][C;R]2                                                                                             |
| 92          | [N;R0][c;R]1:[n;R];[c;R]([O;R0][C;R0]);[c;R](:[c;R];[c;R];1)[C;R0](=[O;R0])[N;R0][C;R]2[C;R][N;R]([C;R0])[C;R][C;R][N;R]([C;R0])[C;R]2                                          |
| 93          | [O;R0]=[C;R0][O;R0][C;R]1[C;R][N;R]2[C;R][C;R][C;R]1[C;R][C;R]2                                                                                                                 |
| 94          | [N;R0][C;R]1[C;R]2[C;R][C;R][N;R]([C;R][C;R]2)[C;R]1[C;R0][c;R]3:[c;R];[c;R];[c;R];[n;R];[c;R];3                                                                                |
| 95          | [O;R0]=[C;R0][N;R0][C;R]1[C;R][N;R]2[C;R][C;R][C;R]1[C;R][C;R]2                                                                                                                 |
| 96          | [O;R0][C;R0][c;R]1:[n;R];[o;R];[c;R]([C;R]2[C;R][C;R][C;R][N;R]2[C;R0]);[c;R];1                                                                                                 |
| 97          | [O;R0][C;R]1[C;R][N;R]([C;R0])[C;R]([C;R]1)[c;R]2:[c;R];[c;R];[c;R];[n;R];[c;R];2                                                                                               |

| Template_ID | TEMPLATE_SMARTS                                                                                                                             |
|-------------|---------------------------------------------------------------------------------------------------------------------------------------------|
| 98          | [N;R0]#[C;R0][c;R]1:[c;R]:[c;R]:[c;R]:[c;R]:[c;R]([O;R0][C;R0][C;R]2[C;R][C;R][C;R][N;R]2):[c;R]:1                                          |
| 99          | [N;R0][C;R0][c;R]1:[c;R]:[n;R]:[c;R]:[c;R]([O;R0][C;R0][C;R]2[C;R][C;R][N;R]2):[c;R]:1                                                      |
| 100         | [N;R0]([c;R]1:[c;R]:[c;R]:[c;R]([C;R0]([N;R0][C;R]2[C;R][C;R][C;R][C;R][N;R]([C;R0][C;R0])[C;R]2)=([O;R0]):[c;R]:[c;R]1)[O;R0][C;R0][C;R0]) |
| 101         | [O;R0]=[C;R]1[N;R][c;R]2:[c;R]:[c;R]:[c;R]:[c;R]:[c;R]:[c;R]:2[C;R]([=O;R0])[N;R]1[C;R]3[C;R][N;R]4[C;R][C;R][C;R]3[C;R][C;R]4              |
| 102         | [O;R0][c;R]1:[c;R]:[c;R]:[c;R]:[c;R]2[C;R][C;R][C;R]([C;R]3[C;R][C;R][C;R][C;R][N;R]3[C;R0])[O;R][c;R]:1:2                                  |
| 103         | [N;R0][c;R]1:[c;R]:[n;R]:[c;R]:[c;R]([O;R0][C;R0][C;R]2[C;R][C;R][C;R][N;R]2[C;R0]):[c;R]:1                                                 |
| 104         | [O;R0]([C;R0][C;R]1[C;R][C;R][C;R][N;R]1[C;R0])[c;R]2:[c;R]:[n;R]:[c;R]:[c;R](:[c;R]:2)-[c;R]3:[c;R]:[c;R]:[n;R]:[c;R]:3                    |
| 105         | [N;R0][C;R0][c;R]1:[c;R]:[n;R]:[c;R]:[c;R](:[c;R]:1)[N;R]2[C;R][C;R]3[C;R][C;R]2[C;R][N;R]3                                                 |
| 106         | [O;R0][c;R]1:[c;R]:[c;R]:[c;R](:[c;R]:[n;R]:1)[C;R]2[C;R][C;R]3[C;R][C;R][C;R]2[N;R]3                                                       |
| 107         | [O;R0]([C;R0])[c;R]1:[c;R]:[n;R]:[c;R]:[c;R](:[c;R]:1)[N;R]2[C;R][C;R][N;R][C;R][C;R]2                                                      |
| 108         | [O;R0][c;R]1:[c;R]:[n;R]:[c;R]:[c;R]([O;R0][C;R0][C;R]2[C;R][C;R][N;R]2):[c;R]:1                                                            |
| 109         | [O;R0]([C;R0])[c;R]1:[c;R]:[c;R]:[c;R]([O;R0][C;R0][C;R]2[C;R][C;R][N;R]2):[c;R]:[n;R]:1                                                    |
| 110         | [N;R0][C;R0]([C;R]1=[C;R][C;R]([C;R0])=[C;R][n;R]2:[c;R]:[c;R]:[n;R]:[c;R]1:2)=([O;R0])                                                     |
| 111         | [N;R0]([C;R0])([C;R0])[C;R]1[C;R][C;R][C;R][c;R]2:[c;R]:[c;R]:[n;R]:[c;R]:[c;R]1:2                                                          |
| 112         | [O;R0]=[C;R]1[N;R]([C;R0])[c;R]2:[c;R]:[c;R]:[c;R](:[c;R]:[c;R]:2[S;R]1)[C;R0][C;R0]                                                        |
| 113         | [O;R0]([C;R0])[c;R]1:[c;R]:[c;R]:[c;R](:[c;R]:[n;R]:1)[N;R]2[C;R][C;R][C;R][N;R][C;R][C;R]2                                                 |
| 114         | [O;R0][c;R]1:[c;R]:[c;R]:[c;R]([C;R]2[C;R][C;R][C;R][N;R]2[C;R0]):[c;R]:[n;R]:1                                                             |
| 115         | [N;R0][c;R]1:[c;R]:[c;R]:[c;R](:[c;R]:[n;R]:1)[C;R]2[C;R][C;R]3[C;R][C;R][C;R]2[N;R]3                                                       |
| 116         | [O;R0]=[C;R]1[C;R]=[C;R][C;R]=[C;R][N;R]1[C;R0][C;R]2[C;R][C;R][C;R][N;R][C;R]2                                                             |
| 117         | [O;R0][C;R0][c;R]1:[c;R]:[c;R]2:[c;R]:[c;R]:[c;R]:[c;R]:[c;R]:2:[n;R]:[c;R]:1[N;R]3[C;R][C;R][N;R]([C;R0])[C;R][C;R]3                       |

### Category: Glutamate

| Template_ID | TEMPLATE_SMARTS                                                                                      |
|-------------|------------------------------------------------------------------------------------------------------|
| 118         | [O;R0][c;R]1:[c;R]:[c;R]:[c;R]2:[c;R]:[c;R]([C;R0][N;R]3[C;R][C;R][C;R][C;R]3):[n;R]:[c;R]:2:[c;R]:1 |
| 119         | [O;R0]=[C;R0]([N;R0][C;R]1[C;R][C;R][C;R]([C;R]2:[c;R]:[c;R]:[c;R]:[c;R]:2)[C;R][C;R]1)[C;R0][C;R0]  |
| 120         | [O;R0]=[C;R]1[C;R]2:[c;R]:[c;R]:[c;R]:[c;R]:[c;R]:2[N;R]=[C;R][N;R]1[C;R]3:[c;R]:[c;R]:[c;R]:[c;R]:3 |
| 121         | [O;R0][C;R]1([C;R][C;R][N;R][C;R][C;R]1)[c;R]2:[c;R]:[c;R]:[c;R]:[c;R]:2                             |
| 122         | [O;R0]=[C;R0][N;R]1[C;R][C;R][C;R]([C;R0][c;R]2:[c;R]:[c;R]:[c;R]:[c;R]:2)[C;R][C;R]1                |



| Template_ID | TEMPLATE_SMARTS                                                                                                                       |
|-------------|---------------------------------------------------------------------------------------------------------------------------------------|
| 123         | [O;R0][C;R0]([C;R0][N;R]1[C;R][C;R][C;R][C;R]1)[c;R]2:[c;R]:[c;R]:[c;R]:[c;R]:[c;R]:2                                                 |
| 124         | [O;R0][C;R0](=[O;R0])[C;R]1[C;R][C;R][c;R]2:[c;R]:[c;R]:[c;R]:[c;R]:[c;R]:2[N;R]1                                                     |
| 125         | [O;R0]=[C;R0][c;R]1:[c;R]:[c;R]2:[c;R]:[c;R]:[c;R]:[c;R]:[c;R]:2:[n;R]:1                                                              |
| 126         | [O;R0][c;R]1:[n;R]:[c;R]2:[c;R]:[c;R]:[c;R]:[c;R]:[c;R]:2:[n;R]:[c;R]:1[O;R0]                                                         |
| 127         | [C;R0](=[O;R0])[c;R]1:[n;R][c;R]2:[c;R][c;R][c;R][c;R]2[n;R][c;R]:1[O;R0]                                                             |
| 128         | [O;R0][c;R]1:[n;R]:[c;R]:[c;R]:[c;R]:[c;R]:1-[c;R]2:[c;R]:[c;R]:[c;R]:[c;R]:[c;R]:2                                                   |
| 129         | [N;R0][c;R]1:[c;R]:[c;R]:[n;R]:[c;R]2:[c;R]:[c;R]:[c;R]:[c;R]:[c;R]:1:2                                                               |
| 130         | [O;R0][C;R0][C;R0][N;R]1[C;R][C;R][C;R]([C;R][C;R]1)[c;R]2:[c;R]:[c;R]:[c;R]:[c;R]:[c;R]:2                                            |
| 131         | [O;R0][c;R]1:[c;R]:[c;R]:[c;R]([C;R0][C;R0][N;R]2[C;R][C;R][C;R][C;R]2):[c;R]:[c;R]:1                                                 |
| 132         | [O;R0]=[C;R0]([O;R0][C;R0][c;R]1:[c;R]:[c;R]:[c;R]:[c;R]:[c;R]:1)[N;R]2[C;R][C;R]([C;R0][C;R][C;R]2                                   |
| 133         | [O;R0]=[C;R0]([N;R0][c;R]1:[c;R]:[c;R]:[c;R]:[c;R]:[c;R]:1)[N;R0][c;R]2:[c;R]:[c;R]:[c;R]:[c;R]:[c;R]:2                               |
| 134         | [O;R0][C;R0][C;R0][C;R]1[N;R][C;R][C;R][c;R]2:[c;R]:[c;R]:[c;R]:[c;R]:[c;R]:[c;R]1:2                                                  |
| 135         | [O;R0][c;R]1:[c;R]:[c;R]:[c;R]2:[n;R]:[c;R]([C;R0]):[n;R]:[c;R]:2:[c;R]:1                                                             |
| 136         | [O;R0]=[C;R0][c;R]1:[n;R]:[c;R]2:[c;R]:[c;R]:[c;R]:[c;R]:[c;R]:2:[n;R]:1                                                              |
| 137         | [O;R0]=[C;R0][N;R]1[C;R][C;R][C;R]([C;R0][N;R0][c;R]2:[n;R]:[c;R]:[c;R]:[c;R]:[n;R]:2)[C;R][C;R]1                                     |
| 138         | [O;R0]=[C;R0]([N;R0][C;R]1[C;R][C;R][C;R][C;R]1)[C;R0][C;R0][c;R]2:[c;R]:[c;R]:[c;R]:[c;R]:[c;R]:2                                    |
| 139         | [O;R0][C;R0][C;R0][N;R]1[C;R][C;R][C;R]([C;R0][c;R]2:[c;R]:[c;R]:[c;R]:[c;R]:2)[C;R][C;R]1                                            |
| 140         | [O;R0]=[S;R0](=[O;R0])[N;R0][c;R]1:[c;R]:[c;R]:[c;R]2:[n;R]:[c;R]([C;R0]):[n;R]:[c;R]:2:[c;R]:1                                       |
| 141         | [O;R0][c;R]1:[c;R]:[c;R]:[c;R]:[c;R]2[C;R][C;R][C;R][C;R]:1:2                                                                         |
| 142         | [O;R0]=[C;R]1[N;R][c;R]2:[c;R]:[c;R]:[c;R]:[c;R]:[c;R]:2[C;R][N;R]1                                                                   |
| 143         | [O;R0]=[C;R]1[N;R][c;R]2:[c;R]:[c;R]:[c;R]:[c;R]:[c;R]:2[O;R]1                                                                        |
| 144         | [O;R0][c;R]1:[c;R]:[c;R]:[c;R]:[c;R]([C;R]2[C;R][C;R][C;R][C;R]2):[c;R]:1                                                             |
| 145         | [O;R0][c;R]1:[c;R]:[c;R]:[c;R](:[c;R]:[c;R]:1)[C;R]2[C;R][C;R][N;R]([C;R0][C;R0][C;R0])[C;R][C;R]2                                    |
| 146         | [O;R0]=[C;R0]([N;R0][C;R0][c;R]1:[c;R]:[c;R]:[c;R]:[c;R]:[c;R]:1)[c;R]2:[c;R]:[c;R]:[c;R]:[c;R]:[c;R]:2                               |
| 147         | [O;R0][c;R]1:[c;R]:[c;R]:[c;R]2:[n;R]:[c;R]:[c;R]:[c;R]:2:[c;R]:1                                                                     |
| 148         | [O;R0][c;R]1:[c;R]:[c;R]:[c;R]([C;R0][C;R]2[C;R][C;R][N;R]([C;R0])[C;R][C;R]2):[c;R]:[c;R]:1                                          |
| 149         | [N;R0][c;R]1:[c;R]:[c;R](:[c;R]:[c;R]:[n;R]:1)[N;R]2[C;R][C;R][c;R]3:[c;R]:[c;R]:[c;R]:[c;R]:[c;R]:3[C;R]2                            |
| 150         | [O;R0][C;R0]([C;R0]([N;R0])[C;R0][N;R]1[C;R]=[C;R][C;R](=[O;R0])[N;R]([C;R0][c;R]2:[c;R]:[c;R]:[c;R]:[c;R]:[c;R]:2)[C;R]1=[O;R0])=[O; |

| Template_ID | TEMPLATE_SMARTS                                                                                                                                         |
|-------------|---------------------------------------------------------------------------------------------------------------------------------------------------------|
|             | R0]                                                                                                                                                     |
| 151         | [N;R0][C;R0][C;R0][C;R0]([c;R]1:[c;R];[c;R];[c;R];[c;R]([F;R0]):[c;R]:1)[c;R]2:[c;R];[c;R];[c;R];[c;R]([F;R0]):[c;R]:2                                  |
| 152         | [N;R0]#[C;R0][c;R]1:[c;R](:[c;R](:[s;R]:[c;R]:1)[C;R0](=[O;R0])[O;R0]-[c;R]2:[c;R];[c;R];[c;R](:[c;R]:[c;R]:2)[C;R0]([C;R0])([C;R0])[C;R0]              |
| 153         | [O;R0]=[C;R0][N;R0][C;R0][C;R]1[C;R][C;R][C;R]([C;R0][O;R0][c;R]2:[c;R];[c;R];[c;R];[c;R]:[c;R]:2)[C;R][C;R]1                                           |
| 154         | [O;R0][c;R]1:[n;R];[c;R]2:[c;R];[c;R]([Cl;R0]):[c;R]:[n;R];[c;R]:2:[c;R]([O;R0]):[c;R]:1                                                                |
| 155         | [N;R0][C;R]1=[N;R][C;R][C;R][N;R]1[O;R0][C;R0][c;R]2:[c;R];[c;R];[c;R];[c;R];[c;R]:2                                                                    |
| 156         | [O;R0][c;R]1:[c;R];[c;R];[c;R]2[C;R][C;R]([C;R][O;R][c;R]:2:[c;R]:1)[N;R]3[C;R][C;R][C;R][C;R]3                                                         |
| 157         | [O;R0]=[S;R0](=[O;R0])[N;R0][C;R0][C;R0][c;R]1:[c;R];[c;R];[c;R](:[c;R]:[c;R]:1)-[c;R]2:[c;R];[c;R];[c;R];[c;R]:2                                       |
| 158         | [O;R0]=[C;R0][N;R0][C;R0][C;R]1[C;R][C;R][C;R]([C;R0][C;R0][O;R0][c;R]2:[c;R];[c;R];[c;R];[c;R]:[c;R]:2)[C;R][C;R]1                                     |
| 159         | [O;R0]([c;R]1:[c;R];[c;R];[c;R]([C;R0][c;R]2:[n;R];[c;R]3:[c;R];[c;R];[c;R];[c;R];[c;R]:3:[n;R]:2):[c;R];[c;R]:1)[c;R]4:[c;R];[c;R];[c;R];[c;R];[c;R]:4 |
| 160         | [O;R0][c;R]1:[n;R];[c;R]2:[c;R];[c;R];[c;R](:[c;R]:[c;R]:2:[n;R];[c;R]:1)-[n;R]3:[c;R];[c;R];[n;R];[c;R]:3                                              |
| 161         | [O;R0][c;R]1:[c;R];[c;R];[c;R]([C;R0][C;R0][C;R0][N;R]2[C;R][C;R][C;R]([C;R0][c;R]3:[c;R];[c;R];[c;R];[c;R]:3)[C;R][C;R]2):[c;R];[c;R]:1                |
| 162         | [N;R0][c;R]1:[c;R];[c;R];[n;R];[c;R](:[c;R]:1)[N;R]2[C;R][C;R][c;R]3:[c;R];[c;R];[c;R];[c;R]:3[C;R]2                                                    |
| 163         | [N;R0]#[C;R0][c;R]1:[c;R];[n;R](:[c;R](:[c;R]:1-[c;R]2:[c;R];[c;R];[c;R](:[c;R]:[c;R]:2)-[c;R]3:[c;R];[c;R];[c;R];[c;R]:3)[C;R0](=[O;R0])[O;R0][C;R0]   |
| 164         | [O;R0][C;R0]([c;R]1:[s;R];[c;R];[c;R];[c;R]:1[C;R0][N;R]2[C;R]([C;R]=[C;R][N;R]([C;R0][C;R0]([N;R0])[C;R0](=[O;R0])[O;R0])[C;R]2=[O;R0])=[O;R0])=[O;R0] |
| 165         | [O;R0][C;R0](=[O;R0])[C;R]1[C;R][C;R]([C;R][C;R][N;R]1)[S;R0][c;R]2:[n;R];[n;R];[n;R]:2                                                                 |
| 166         | [O;R0]([C;R0]([F;R0])([F;R0])[F;R0])[c;R]1:[c;R];[c;R];[c;R](:[c;R]:[c;R]:1)[C;R]2=[N;R][C;R][C;R]([N;R]2)[c;R]3:[c;R];[c;R];[c;R];[c;R]:3              |
| 167         | [O;R0][c;R]1:[n;R];[c;R]2:[c;R];[c;R];[c;R];[n;R];[c;R]:2:[n;R];[c;R]:1[O;R0]                                                                           |
| 168         | [N;R0]([C;R0])[C;R0]([C;R0][c;R]1:[c;R];[c;R];[c;R];[c;R]:1[N;R0][C;R0])[c;R]2:[s;R];[c;R];[c;R];[c;R]:2[C;R0]                                          |
| 169         | [O;R0][c;R]1:[n;R];[c;R]2:[c;R];[c;R];[c;R];[c;R]:2:[n;R]:1[C;R0][C;R0][C;R0][N;R]3[C;R][C;R][C;R]([C;R0][c;R]4:[c;R];[c;R];[c;R];[c;R]:4)[C;R][C;R]3   |
| 170         | [N;R0]([C;R0][C;R]1[C;R][C;R][N;R]([C;R0][C;R0][C;R0][c;R]2:[c;R];[c;R];[c;R];[c;R]:2)[C;R][C;R]1)[c;R]3:[n;R];[c;R];[c;R];[c;R]:[n;R]:3                |
| 171         | [O;R0][C;R0](=[O;R0])[C;R]1[C;R][C;R]([C;R0][c;R]2:[n;R];[n;R];[n;R]:2)[C;R][C;R][N;R]1                                                                 |
| 172         | [O;R0][C;R0]([C;R0]([N;R0])[C;R0][c;R]1:[c;R]([O;R0]):[n;R];[o;R]:[c;R]:1-[c;R]2:[c;R];[c;R];[c;R];[c;R]:[n;R]:2)=[O;R0]                                |
| 173         | [O;R0]=[S;R0]([N;R0][C;R0][C;R0]([C;R0])[c;R]1:[c;R];[c;R];[c;R](:[c;R]:[c;R]:1)-[c;R]2:[c;R];[c;R];[s;R]:[c;R]:2)=[O;R0][C;R0]                         |
| 174         | [O;R0][C;R0]([C;R0]([N;R0])[C;R0][c;R]1:[c;R]([O;R0]):[n;R];[o;R]:[c;R]:1-[c;R]2:[o;R];[c;R];[c;R];[c;R]:2)=[O;R0]                                      |

Category: InwardlyRectifyingK<sup>+</sup>

| Template_ID | TEMPLATE_SMARTS                                                                                                                        |
|-------------|----------------------------------------------------------------------------------------------------------------------------------------|
| 175         | [C;R0][C;R0]([O;R0])([C;R0](=[O;R0])[N;R0][c;R]1:[c;R]:[c;R]:[c;R]:[c;R]:[c;R]:1)[S;R0](=[O;R0])(=[O;R0])[N,C,R,R0][C;R0]              |
| 176         | [N;R0]#[C;R0][c;R]1:[c;R]:[c;R]:[c;R]:[c;R]2[O;R][C;R]([C;R0])([C;R0])[C;R]([C;R]([c;R]:2:[c;R]:1)[N;R]3[C;R][C;R][C;R]3=[O;R0])[O;R0] |

Category: K<sup>+</sup>

| Template_ID | TEMPLATE_SMARTS                                                                                                            |
|-------------|----------------------------------------------------------------------------------------------------------------------------|
| 177         | [N;R0]([C;R0])[C;R0][C;R]1([C;R][C;R][C;R][C;R][C;R]1)[c;R]2:[c;R]:[c;R]:[c;R]:[c;R]:[c;R]:2                               |
| 178         | [N;R0][c;R]1:[c;R]:[c;R]:[c;R]([c;R]:[c;R]:1)-[c;R]2:[c;R]:[c;R]:[c;R]:[c;R]:[c;R]:2                                       |
| 179         | [N;R0]#[C;R0][c;R]1:[c;R]2:[n;R]:[c;R]:[c;R]:[c;R]:[c;R]:2:[n;R]:[c;R]:1                                                   |
| 180         | [N;R0]([C;R0])[C;R0][c;R]1:[c;R]:[c;R]:[c;R]:[c;R]:[c;R]:1[O;R0][c;R]2:[c;R]:[c;R]:[c;R]:[c;R]:[c;R]:2                     |
| 181         | [N;R0][C;R]1[C;R][C;R][N;R]([C;R0][c;R]2:[c;R]:[c;R]:[c;R]:[c;R]:[c;R]:2)[C;R][C;R]1                                       |
| 182         | [N;R0][c;R]1:[n;R]:[c;R]2:[c;R]:[c;R]:[c;R]:[c;R]:[c;R]:2:[n;R]:1                                                          |
| 183         | [N;R0]([C;R0])[C;R0][c;R]1:[c;R]:[c;R]:[c;R]:[c;R]:[c;R]:1-[c;R]2:[c;R]:[c;R]:[c;R]:[c;R]:[c;R]:2                          |
| 184         | [O;R0]=[S;R0]([c;R]1:[c;R]:[c;R]:[c;R]:[c;R]:1)(=[O;R0])[N;R]2[C;R][C;R][N;R][C;R][C;R]2                                   |
| 185         | [O;R0]=[C;R0]([N;R0][C;R0][C;R]1[C;R][C;R][N;R]([C;R0])[C;R][C;R]1)[c;R]2:[c;R]:[c;R]:[c;R]:[c;R]:[c;R]:2                  |
| 186         | [O;R0]=[C;R0][N;R]1[C;R][C;R][N;R]([C;R][C;R]1)[c;R]2:[c;R]:[c;R]:[c;R]:[c;R]:[c;R]:2                                      |
| 187         | [O;R0]=[C;R0]([c;R]1:[c;R]:[c;R]:[c;R]:[c;R]:1)[N;R0][C;R0][C;R0][c;R]2:[c;R]:[c;R]:[c;R]:[c;R]:[c;R]:2                    |
| 188         | [O;R0]=[C;R0][N;R0][C;R]1[C;R]([N;R][c;R]2:[c;R]:[c;R]:[c;R]:[c;R]:2[C;R](=[N;R]1)[c;R]3:[c;R]:[c;R]:[c;R]:[c;R]:3)=[O;R0] |
| 189         | [O;R0][C;R]1[c;R]2:[c;R]:[c;R]:[c;R]:[c;R]:[c;R]:2[C;R][C;R][C;R]1                                                         |
| 190         | [N;R0]([C;R0])[C;R0][C;R0][C;R0]([O;R0][c;R]1:[c;R]:[c;R]:[c;R]:[c;R]:[c;R]:1)[c;R]2:[c;R]:[c;R]:[c;R]:[c;R]:[c;R]:2       |
| 191         | [O;R0]([C;R0])[c;R]1:[c;R]:[c;R]:[c;R]:[c;R]:[c;R]:1[O;R0][C;R0][c;R]2:[c;R]:[c;R]:[c;R]:[c;R]:[c;R]:2                     |
| 192         | [N;R0]([C;R0][C;R0][C;R0][C;R0])[S;R0](=[O;R0])(=[O;R0])[c;R]1:[c;R]:[c;R]:[c;R]2:[c;R]:[c;R]:[c;R]:[c;R]:[c;R]:2:[c;R]:1  |
| 193         | [O;R0]=[C;R0][C;R]1=[C;R]([C;R0])[N;R][c;R]2:[c;R]:[c;R]:[n;R]:[n;R]:2[C;R]1                                               |
| 194         | [O;R0][c;R]1:[c;R]:[c;R]:[c;R]([O;R0][C;R0][C;R0][N;R]2[C;R][C;R][C;R][C;R]2):[c;R]:[c;R]:1                                |
| 195         | [O;R0]=[C;R0]([N;R]1[C;R][C;R][N;R][C;R][C;R]1)[c;R]2:[c;R]:[c;R]:[c;R]:[c;R]:[c;R]:2                                      |
| 196         | [O;R0]=[C;R]1[c;R]2:[c;R]:[c;R]:[c;R]:[c;R]:[c;R]:2[C;R][C;R][C;R]1[C;R0]                                                  |
| 197         | [O;R0]([C;R0])[c;R]1:[c;R]:[c;R]:[c;R]([C;R0][N;R0][c;R]2:[c;R]:[c;R]:[c;R]:[c;R]:[n;R]:2):[c;R]:[c;R]:1                   |

| Template_ID | TEMPLATE_SMARTS                                                                                                                                               |
|-------------|---------------------------------------------------------------------------------------------------------------------------------------------------------------|
| 198         | [N;R0]([C;R0])[C;R]1[C;R][C;R][N;R]([C;R]1)[c;R]2:[c;R]:[c;R]:[c;R]:[c;R]:[n;R]:2                                                                             |
| 199         | [O;R0]([C;R0])[c;R]1:[c;R]:[c;R]:[c;R]:[c;R]:[c;R]:[c;R]:1[O;R0][C;R0][C;R0][N;R]2[C;R][C;R][C;R][C;R]2                                                       |
| 200         | [O;R0]=[C;R]1[c;R]2:[c;R]:[c;R]:[c;R]:[c;R]:[c;R]:[c;R]:2[N;R]=[C;R][N;R]1                                                                                    |
| 201         | [N;R0][c;R]1:[c;R]:[c;R]([N;R]2[C;R][C;R][C;R][C;R][C;R]2):[n;R]:[c;R]:[c;R]:1                                                                                |
| 202         | [O;R0]=[C;R0][N;R0][C;R0]([C;R0][C;R0][N;R]1[C;R][C;R][C;R][C;R][C;R]1)[c;R]2:[c;R]:[c;R]:[c;R]:[c;R]:[c;R]:2                                                 |
| 203         | [O;R0]([c;R]1:[c;R]:[c;R]:[c;R]:[c;R]:[c;R]:1)[C;R0][c;R]2:[n;R]:[o;R]:[c;R](:[n;R]:2)-[c;R]3:[c;R]:[c;R]:[c;R]:[c;R]:[c;R]:3                                 |
| 204         | [O;R0]=[C;R]1[N;R][C;R][C;R][N;R]1[C;R0][C;R0][N;R]2[C;R][C;R][C;R][C;R][C;R]2                                                                                |
| 205         | [N;R0][C;R0][C;R]1([C;R][C;R][N;R][C;R][C;R]1)[c;R]2:[c;R]:[c;R]:[c;R]:[c;R]:[c;R]:2                                                                          |
| 206         | [O;R0]([C;R0][c;R]1:[n;R]:[c;R](-[c;R]2:[c;R]:[c;R]:[c;R]:[c;R]:[c;R]:2):[s;R]:[c;R]:1)[c;R]3:[c;R]:[c;R]:[c;R]:[c;R]:[c;R]:3[C;R0]                           |
| 207         | [O;R0]=[C;R0]([N;R]1[C;R][C;R][C;R][C;R][C;R]1)[c;R]2:[c;R]:[c;R]:[c;R]:[c;R]:[c;R]:2                                                                         |
| 208         | [O;R0]=[C;R]1[N;R]([C;R]2[C;R][C;R][N;R][C;R][C;R]2)[c;R]:[c;R][N;R]1                                                                                         |
| 209         | [O;R0][C;R0]([c;R]1:[c;R]:[c;R]:[c;R]:[c;R]:[c;R]:1)[C;R]2[C;R][C;R][N;R]([C;R0][C;R0])[C;R][C;R]2                                                            |
| 210         | [O;R0]([c;R]1:[c;R]:[c;R]2[C;R]([N;R]([C;R][C;R][c;R]:2:[c;R]:[c;R]:1[O;R0][C;R0])[C;R0])[C;R0])[C;R0]                                                        |
| 211         | [N;R0][C;R]1[C;R][N;R]([C;R0][c;R]2:[c;R]:[c;R]:[c;R]:[c;R]:[c;R]:2)[C;R][C;R]1                                                                               |
| 212         | [O;R0][c;R]1:[c;R]:[c;R]:[c;R]:[c;R]:[c;R]:1[O;R0][c;R]2:[c;R]:[c;R]:[c;R]:[c;R]:[c;R]:2                                                                      |
| 213         | [N;R0]([c;R]1:[n;R]:[c;R]:[c;R]:[c;R](-[c;R]2:[c;R]:[n;R]:[c;R](:[n;R]:2[C;R0]([C;R0])[C;R0]):[n;R]:1)[c;R]3:[c;R]:[c;R]:[c;R]:[c;R]:[c;R]:3                  |
| 214         | [O;R0]=[S;R0](=[O;R0])[c;R]1:[c;R]:[c;R]:[c;R]2[C;R][C;R][N;R][C;R][C;R]:2:[c;R]:1                                                                            |
| 215         | [N;R0]([C;R0])[C;R0](=[O;R0])[c;R]1:[c;R]([N;R0][C;R0]):[n;R]:[c;R](:[n;R]:[c;R]:1[O;R0][C;R0][C;R]2[C;R][C;R][N;R][C;R][C;R]2)[C;R0]#[N;R0]                  |
| 216         | [O;R0]=[C;R]1[c;R]2:[c;R]:[c;R]:[c;R]([O;R0][C;R0]):[c;R]:[c;R]:2[C;R](=[C;R]([N;R]1[C;R0])[C;R0])[c;R]3:[c;R]:[c;R]:[c;R]:[c;R]:[c;R]:3                      |
| 217         | [O;R0]=[C;R0][N;R0]([C;R]1[C;R][c;R]2:[c;R]:[c;R]:[c;R]:[c;R]:[c;R]:2[C;R][C;R]1)[C;R0]                                                                       |
| 218         | [O;R0]=[S;R0]([c;R]1:[c;R]:[c;R]:[c;R]([C;R0]=[C;R0]):[n;R]:[c;R]:1)[c;R]2:[c;R]:[c;R]:[c;R]:[c;R]:[c;R]:2                                                    |
| 219         | [O;R0]=[C;R0]([C;R0][N;R0][c;R]1:[c;R]:[c;R](:[n;R]:[c;R](:[n;R]:1)-[c;R]2:[o;R]:[c;R]([C;R0]):[c;R]:[c;R]:2)-[n;R]3:[n;R]:[c;R]([C;R0]):[c;R]:[c;R]:3[C;R0]) |
| 220         | [O;R0][c;R]1:[c;R]:[c;R]:[c;R]2[C;R][C;R]([C;R0][C;R0][N;R]3[C;R][C;R][C;R]([C;R][C;R]3)[c;R]4:[c;R]:[c;R]:[c;R]:[c;R]:[c;R]:4)[C;R][C;R][c;R]:2:[c;R]:1      |
| 221         | [O;R0]=[C;R0][N;R]1[C;R][C;R](=[C;R][C;R]1[c;R]2:[c;R]:[c;R]:[c;R]:[c;R]:[c;R]:2)[c;R]3:[c;R]:[c;R]([F;R0]):[c;R]:[c;R]:[c;R]:3[F;R0]                         |
| 222         | [O;R0]=[S;R0](=[O;R0])([C;R]1[C;R][C;R][N;R]([C;R0][C;R0])[C;R][C;R]1)[c;R]2:[c;R]:[c;R]:[c;R]:[c;R]:[c;R]:2                                                  |
| 223         | [O;R0]=[C;R0][N;R0][c;R]1:[c;R]:[c;R]:[c;R]2[C;R][C;R][C;R][C;R]([N;R0][S;R0]([c;R]3:[c;R]:[c;R]:[c;R]:[c;R]:[c;R]:3)(=[O;R0]=[O;R0])[c;R]:2:[c;R]:1          |

| Template_ID | TEMPLATE_SMARTS                                                                                                                                                      |
|-------------|----------------------------------------------------------------------------------------------------------------------------------------------------------------------|
| 224         | [O;R0]=[S;R0]([c;R]1:[c;R]:[c;R]:[c;R]:[c;R]:[c;R]:1)(=[O;R0])[N;R0][C;R]2[C;R][C;R]([C;R0])([C;R0])[O;R][c;R]:[c;R]2                                                |
| 225         | [O;R0]=[S;R0]([N;R0][C;R]1[C;R]([O;R0])[C;R]([C;R0])([C;R0])[O;R][c;R]2:[c;R]:[c;R]:[c;R]:[c;R]:[c;R]1:2)=[O;R0]                                                     |
| 226         | [O;R0]([c;R]1:[c;R]:[c;R]:[c;R]:[c;R]:[c;R]:1)[C;R0][N;R0][C;R]2[C;R][C;R][C;R][N;R][C;R]2[C;R]3:[c;R]:[c;R]:[c;R]:[c;R]:[c;R]3)[C;R0]([F;R0])([F;R0])[F;R0]         |
| 227         | [N;R0][C;R]1[C;R][C;R][N;R]([C;R]2[C;R][C;R][N;R]([C;R0]=[O;R0])[C;R][C;R]2)[C;R][C;R]1                                                                              |
| 228         | [O;R0]=[C;R]1[C;R][N;R]([C;R][C;R][N;R]1[C;R]2[C;R][c;R]3:[c;R]:[c;R]:[c;R]([C;R0]):[c;R]:[c;R]:3[C;R][C;R]2)[C;R0][C;R0]                                            |
| 229         | [O;R0][c;R]1:[c;R]:[c;R]:[c;R]([N;R0][c;R]2:[n;R]:[c;R]:[n;R]:[c;R]3:[c;R]:[c;R]:[c;R]([O;R0]):[c;R]:2:3):[c;R]:[c;R]:1                                              |
| 230         | [O;R0]=[C;R0][C;R0]([N;R0])[C;R]1[C;R][C;R][C;R]([C;R][C;R]1)[N;R0][S;R0]([O;R0])(=[O;R0])[c;R]2:[c;R]:[c;R]:[c;R]([O;R0][C;R0]([F;R0])([F;R0])[F;R0]):[c;R]:[c;R]:2 |
| 231         | [N;R0]([C;R0])[C;R]1[C;R][C;R][N;R]([C;R][C;R]1)[c;R]2:[n;R]:[c;R]3:[c;R]:[c;R]:[c;R]:[c;R]:[c;R]:3:[n;R]:2[C;R0][c;R]4:[c;R]:[c;R]:[c;R]([F;R0]):[c;R]:[c;R]:4      |
| 232         | [O;R0][C;R0]([C;R0])[c;R]1:[c;R]:[n;R](-[c;R]2:[c;R]:[c;R]:[c;R]([F;R0]):[c;R]:[c;R]:2):[c;R]3:[c;R]:[c;R]:[c;R]([Cl;R0]):[c;R]:[c;R]:1:3                            |
| 233         | [N;R0][C;R0]([C;R0]([C;R0])[c;R]1:[c;R]:[c;R]:[c;R]:[c;R]:[c;R]:1)-[c;R]2:[c;R]:[c;R]:[c;R]([F;R0]):[c;R]:[c;R]:2)[C;R0]([O;R0])[N;R]3[C;R][C;R]([F;R0])[C;R]3       |
| 234         | [O;R0]([C;R0][C;R0][c;R]1:[c;R]:[c;R]:[c;R]:[c;R]:1)[C;R]2[C;R][C;R][C;R][C;R]2[N;R]3[C;R][C;R][O;R][C;R][C;R]3                                                      |
| 235         | [O;R0]=[C;R0][N;R0][C;R0][C;R0][c;R]1:[c;R]:[c;R]:[c;R]([c;R]:[c;R]:1)[S;R0]([O;R0])(=[O;R0])[N;R0][C;R0]([O;R0])[N;R0][C;R]2[C;R][C;R][C;R][C;R]2                   |
| 236         | [N;R0][C;R0][c;R]1:[n;R]:[n;R]([c;R]:[c;R]:1[C;R0])-[c;R]2:[c;R]:[c;R]:[c;R]([Cl;R0]):[c;R]:[c;R]:2[Cl;R0]                                                           |
| 237         | [O;R0]=[C;R0]([N;R]1[C;R][C;R][S;R][C;R]1[c;R]2:[c;R]:[c;R]:[c;R]([C;R0]):[c;R]([c;R]:2)[C;R0])[C;R0]                                                                |
| 238         | [O;R0]([C;R]1[C;R][C;R][C;R][C;R]1)[C;R0][C;R0][c;R]2:[c;R]:[c;R]:[c;R]:[c;R]:[c;R]:[c;R]:[c;R]:[c;R]:2:3                                                            |
| 239         | [N;R0]([C;R0][c;R]1:[c;R]([c;R](-[c;R]2:[c;R]:[n;R]:[c;R]:[c;R]:[c;R]:2):[n;R]:[n;R]:1)[C;R0])[C;R]3[C;R][C;R][C;R]3                                                 |
| 240         | [O;R0][C;R0][C;R]1[C;R][C;R][C;R][N;R]([C;R0][C;R0][C;R0][C;R]2[C;R][C;R][C;R]3:[c;R]:[c;R]:[c;R]([O;R0][C;R0]):[c;R]:[c;R]2:3)[C;R]1                                |
| 241         | [N;R0][C;R0][c;R]1:[n;R]:[c;R]:[c;R]2:[c;R]:[c;R]:[c;R]([O;R0][C;R0]):[c;R]:[c;R]:2:[c;R]:1-[c;R]3:[c;R]:[c;R]:[c;R]:[c;R]:3                                         |
| 242         | [N;R0]([C;R0]([C;R0]([C;R0]([C;R0])[c;R]1:[c;R]:[c;R]:[c;R]:[c;R]:[c;R]:1)[c;R]2:[c;R]:[c;R]:[c;R]:[n;R]:[c;R]:2)=[O;R0])([C;R0]([C;R0])[C;R0][C;R0]([C;R0])[C;R0]   |

Category: Na<sup>+</sup>

| Template_ID | TEMPLATE_SMARTS                                                                                      |
|-------------|------------------------------------------------------------------------------------------------------|
| 243         | [O;R0]([C;R0])[c;R]1:[c;R]:[c;R]:[c;R]([C;R0][N;R]2[C;R][C;R][N;R]([C;R][C;R]2)[C;R0]):[c;R]:[c;R]:1 |
| 244         | [N;R0][c;R]1:[n;R]:[c;R]2:[c;R]:[c;R]:[c;R]:[c;R]:[c;R]:2:[s;R]:1                                    |
| 245         | [O;R0]=[C;R0][c;R]1:[o;R]:[c;R](-[c;R]2:[c;R]:[c;R]:[c;R]:[c;R]:[c;R]:2):[c;R]:[c;R]:1               |

| Template_ID | TEMPLATE_SMARTS                                                                                                                                                 |
|-------------|-----------------------------------------------------------------------------------------------------------------------------------------------------------------|
| 246         | [c;R]1:[n;R]:[c;R]:([c;R]:[n;R]:1)-[c;R]2:[c;R]:[c;R]:[c;R]:([c;R]:[c;R]:2)-[c;R]3:[c;R]:[c;R]:[c;R]:[c;R]:[c;R]:3                                              |
| 247         | [N;R0][C;R0]([C;R0][O;R0][c;R]1:[c;R]:[c;R]:[c;R]:[c;R]:[c;R]:1)[c;R]2:[c;R]:[c;R]:[c;R]:[c;R]:[c;R]:2                                                          |
| 248         | [O;R0]([c;R]1:[c;R]:[c;R]:[c;R]:[c;R]:[c;R]:1)[c;R]2:[c;R]:[c;R]:[c;R]:([c;R]:[c;R]:2)-[c;R]3:[c;R]:[c;R]:[n;R]:[n;R]:3                                         |
| 249         | [O;R0]=[C;R0]([c;R]1:[c;R]:[c;R]:[c;R]:[c;R]:[c;R]:1[O;R0][C;R0])[N;R]2[C;R][C;R][C;R]2                                                                         |
| 250         | [O;R0][C;R0]([C;R0][N;R]1[C;R][C;R][C;R][C;R]1)[C;R0][O;R0][c;R]2:[c;R]:[c;R]:[c;R]:[c;R]:[c;R]:2                                                               |
| 251         | [O;R0]=[C;R0][N;R0][C;R0][c;R]1:[c;R]:[c;R]:[c;R]:([s;R]:1)-[c;R]2:[c;R]:[c;R]:[c;R]:[s;R]:2                                                                    |
| 252         | [N;R0][C;R0][c;R]1:[c;R]:[c;R]:[c;R]:([c;R]:[c;R]:1)-[c;R]2:[c;R]:[c;R]:[c;R]:[c;R]:[c;R]:2                                                                     |
| 253         | [O;R0][C;R0]([C;R0][N;R]1[C;R][C;R][N;R]([C;R][C;R]1)[C;R0][c;R]2:[c;R]:[c;R]:[c;R]:[c;R]:[c;R]:2)[C;R0]                                                        |
| 254         | [N;R0][C;R0][c;R]1:[n;R]:[o;R]:[c;R]:([n;R]:1)-[c;R]2:[n;R]:[n;R]:[c;R]3:[c;R]:[c;R]:[c;R]:[c;R]:[c;R]:2:3                                                      |
| 255         | [N;R]1[C;R](=[O;R0])[C;R]([N;R0][C;R0](=[O;R0])[C;R0][N;R0])[N;R]=[C;R]([c;R]2:[c;R]:[c;R]:[c;R]:[c;R]:2)[c;R]3:[c;R]:[c;R]:[c;R]:[c;R]:[c;R]:31                |
| 256         | [O;R0][C;R0]([C;R0][C;R0][c;R]1:[c;R]:[c;R]:[c;R]:[c;R]:[c;R]:1)[C;R]2[C;R][C;R][C;R]2[C;R0]                                                                    |
| 257         | [N;R0][C;R0]([C;R0][N;R0][C;R]1[C;R][N;R]([C;R0])[c;R]:[c;R][C;R][C;R]1)[C;R0][c;R]2:[c;R]:[c;R]:[c;R]:[c;R]:[c;R]:2                                            |
| 258         | [N;R0]([C;R0]=[O;R0])[C;R0]([C;R0][c;R]1:[c;R]:[c;R]:[c;R]:[c;R]:[c;R]:1)[C;R0](=[O;R0])[N;R0][C;R0][c;R]2:[n;R]:[c;R]3:[c;R]:[c;R]:[c;R]:[n;R]:[c;R]:3:[n;R]:2 |

### Category: Purinoceptors

| Template_ID | TEMPLATE_SMARTS                                                                                                                     |
|-------------|-------------------------------------------------------------------------------------------------------------------------------------|
| 259         | [O;R0]=[C;R0]([c;R]1:[c;R]:[c;R]:[c;R]:[c;R]:[c;R]:1[C;R0])[N;R0][C;R0][C;R]23[C;R][C;R]4[C;R][C;R]([C;R][C;R]([C;R]4)[C;R]2)[C;R]3 |
| 260         | [N;R0]([C;R0][C;R0])[S;R0](=[O;R0])(=[O;R0])[c;R]1:[c;R]:[c;R]:[c;R]:[c;R]2:[c;R]:[n;R]:[c;R]:[c;R]:[c;R]:1:2                       |

### Category: Sulfonylurea

| Template_ID | TEMPLATE_SMARTS                                                                                                                                 |
|-------------|-------------------------------------------------------------------------------------------------------------------------------------------------|
| 261         | [O;R0]=[S;R0]([c;R]1:[c;R]:[c;R]:[c;R]:[c;R]:[c;R]:1)(=[O;R0])[c;R]2:[c;R]:[c;R]:[c;R]:[c;R]:[c;R]:2                                            |
| 262         | [C;R0][C;R0]([O;R0])([C;R0](=[O;R0])[N;R0][c;R]1:[c;R]:[c;R]:[c;R]:([c;R]:[c;R]:1)[S;R0](=[O;R0])(=[O;R0])[N;R,R0])[C;R0]([F;R0])([F;R0])[F;R0] |
| 263         | [O;R0][C;R]1[C;R][c;R]2:[c;R]:[c;R]:[c;R]:[c;R]:[c;R]:2[O;R][C;R]1([C;R0])[C;R0]                                                                |

### Category: Transient receptor potential

| Template_ID | TEMPLATE_SMARTS |
|-------------|-----------------|
|             |                 |

| Template_ID | TEMPLATE_SMARTS                                                                                                                                               |
|-------------|---------------------------------------------------------------------------------------------------------------------------------------------------------------|
| 264         | [O;R0]=[C;R0][N;R0][C;R0][C;R0][c;R]1:[c;R]:[n;R]:[c;R]2:[c;R]:[c;R]:[c;R]:[c;R]:[c;R]:1:2                                                                    |
| 265         | [O;R0]=[C;R0][N;R0][c;R]1:[n;R]:[c;R]2:[c;R]:[c;R]:[c;R]:[c;R]:[c;R]:2:[s;R]:1                                                                                |
| 266         | [O;R0]=[C;R0][N;R0][c;R]1:[c;R]:[c;R]:[c;R]:[c;R]2:[c;R]:[n;R]:[c;R]:[c;R]:[c;R]:1:2                                                                          |
| 267         | [O;R0]=[C;R0]([N;R0][C;R0][c;R]1:[c;R]:[c;R]:[c;R]:[c;R]:[c;R]:1)[N;R0][c;R]2:[c;R]:[c;R]:[c;R]:[c;R]:2                                                       |
| 268         | [O;R0][c;R]1:[c;R]:[c;R](-[c;R]2:[c;R]:[c;R]:[c;R]([C;R0]):[c;R]:[c;R]:2):[n;R]:[c;R]:[n;R]:1                                                                 |
| 269         | [O;R0]=[C;R0]([N;R0][c;R]1:[c;R]:[c;R]:[c;R]:[c;R]:1)[N;R]2[C;R][C;R][N;R][C;R][C;R]2                                                                         |
| 270         | [N;R0][C;R0](=[O;R0])[N;R0][c;R]1:[c;R]:[c;R]:[c;R]:[c;R]2:[n;R]:[n;R]:[c;R]:[c;R]:1:2                                                                        |
| 271         | [N;R0][C;R0](=[O;R0])[N;R]1[C;R][C;R][N;R]([C;R][C;R]1)[c;R]2:[c;R]:[c;R]:[c;R]:[c;R]:[n;R]:2                                                                 |
| 272         | [N;R0][C;R0](=[O;R0])[C;R]1[C;R][C;R][N;R]([C;R][C;R]1)[c;R]2:[c;R]:[c;R]:[c;R]:[c;R]:[c;R]:2                                                                 |
| 273         | [O;R0]=[C;R0]([N;R0][c;R]1:[c;R]:[c;R]:[c;R]:[c;R]:1)[C;R]2[C;R][C;R][N;R][C;R][C;R]2                                                                         |
| 274         | [O;R0]=[C;R0]([N;R0][c;R]1:[c;R]:[c;R]:[c;R]:[c;R]:1)[C;R]2=[C;R][C;R][N;R][C;R][C;R]2                                                                        |
| 275         | [O;R0][c;R]1:[c;R]:[c;R]:[c;R](-[c;R]:[c;R]:1)[C;R0][N;R0][C;R0][C;R0][c;R]2:[c;R]:[c;R]:[c;R]:[c;R]:2                                                        |
| 276         | [O;R0]=[C;R0]([c;R]1:[n;R]:[c;R]:[s;R]:[c;R]:1)[N;R0][c;R]2:[c;R]:[c;R]:[c;R]:[c;R]:2                                                                         |
| 277         | [N;R0]([c;R]1:[c;R]:[c;R](-[c;R]2:[c;R]:[c;R]:[c;R]([C;R0]):[c;R]:[c;R]:2):[n;R]:[c;R]:[n;R]:1)[c;R]3:[c;R]:[c;R]:[c;R]:[c;R]:3                               |
| 278         | [O;R0]=[C;R0]([c;R]1:[c;R]:[c;R]:[c;R]:[c;R]:1)[N;R0][c;R]2:[c;R]:[c;R]:[c;R]:[n;R]:[c;R]:2                                                                   |
| 279         | [N;R0][c;R]1:[c;R]:[c;R]:[c;R]2[O;R][C;R][C;R][O;R][c;R]:2:[c;R]:1                                                                                            |
| 280         | [N;R0][C;R0]([c;R]1:[n;R]:[c;R]([C;R0][c;R]2:[c;R](-[c;R]:[c;R]:[c;R]:[c;R]:2[Cl;R0])[Cl;R0]):[s;R]:[c;R]:1)=[O;R0]                                           |
| 281         | [O;R0]=[C;R0]([N;R0][C;R0][c;R]1:[c;R]:[c;R]:[c;R]:[c;R]:1)[C;R0][c;R]2:[c;R]:[c;R]:[c;R]:[c;R]:2                                                             |
| 282         | [O;R0]=[C;R0]([c;R]1:[c;R]:[c;R]:[c;R]:[n;R]:1)[N;R0][c;R]2:[c;R]:[c;R]:[c;R]:[c;R]:2                                                                         |
| 283         | [O;R0]([c;R]1:[c;R]:[c;R]2:[n;R]:[c;R]:[n;R]:[c;R]:2:[c;R]:[c;R]:1)[C;R0]                                                                                     |
| 284         | [c;R]1:[c;R]:[c;R]:[c;R]([N;R0][C;R0](=[O;R0])[c;R]2:[c;R]:[n;R]:[c;R]([C;R0][c;R]3:[c;R]:[c;R]:[c;R]:[c;R]:3):[n;R]:2):[c;R]:[c;R]:1                         |
| 285         | [O;R0]=[C;R0]([N;R]1[C;R][C;R][C;R][C;R]1)[N;R0][c;R]2:[c;R]:[c;R]:[c;R](-[c;R]:[c;R]:2)[C;R0]([F;R0])([F;R0])[F;R0]                                          |
| 286         | [O;R0]=[C;R0]([c;R]1:[c;R]:[c;R]:[c;R]:[n;R]:1)[N;R0][c;R]2:[c;R]:[c;R]:[c;R]:[c;R]:2                                                                         |
| 287         | [N;R0]#[C;R0][c;R]1:[c;R]:[c;R]:[c;R]:[n;R]:[c;R]:1[N;R]2[C;R][C;R][N;R][C;R][C;R]2                                                                           |
| 288         | [O;R0]=[C;R0]([N;R0][C;R0][c;R]1:[c;R]:[c;R]:[c;R]:[c;R]:1)[N;R0][C;R0][c;R]2:[c;R]:[c;R]:[c;R]:[c;R]:2                                                       |
| 289         | [c;R]1:[c;R]:[c;R]:[c;R](-[c;R]:[c;R]:1)-[c;R]2:[n;R]:[c;R]3:[c;R]:[c;R](-[c;R]:[c;R]:[c;R]:3:[n;R]:2)-[c;R]4:[n;R]:[c;R]:[c;R]:[c;R]:4                       |
| 290         | [O;R0]=[C;R0]([c;R]1:[c;R]:[c;R]:[c;R]([O;R0][C;R0]([F;R0])([F;R0])[F;R0]):[c;R]:[c;R]:1)[N;R0][C;R0][C;R0][N;R]2[C;R][C;R][C;R]3:[c;R]:[c;R]:[c;R]:[c;R]:2:3 |

| Template_ID | TEMPLATE_SMARTS                                                                                                                            |
|-------------|--------------------------------------------------------------------------------------------------------------------------------------------|
| 291         | [O;R0][c;R]1:[c;R]:[c;R]:[n;R]:[n;R]:1-[c;R]2:[c;R]:[c;R]:[c;R]:[c;R]:[c;R]:[c;R]:2[C;R0]([F;R0])([F;R0])[F;R0]                            |
| 292         | [N;R0][C;R0]([N;R]1[C;R][C;R][N;R]([c;R]2:[c;R]:[c;R]:[c;R]:[c;R]:[c;R]:[c;R]:2[C;R0]([F;R0])([F;R0])[F;R0])[C;R][C;R]1)=[O;R0]            |
| 293         | [O;R0][c;R]1:[c;R]:[c;R]:[c;R]:[c;R]:[c;R](-[c;R]2:[c;R]:[c;R]:[c;R]:[c;R]:[c;R]:2[C;R0]([C;R0])[C;R0]):[c;R]:1                            |
| 294         | [O;R0][c;R]1:[n;R]:[c;R]:[n;R]:[c;R]2:[c;R]:[c;R]([C;R0]([C;R0])[C;R0]):[c;R]:[c;R]:[c;R]:1:2-[c;R]3:[c;R]:[c;R]:[c;R]:[c;R]:[c;R]:[c;R]:3 |
| 295         | [c;R]1:[c;R]:[c;R]:[c;R]2:[n;R]:[c;R](:[n;R]:[c;R]:2:[c;R]:1)[N;R]3[C;R][C;R][N;R][C;R][C;R]3[a,A]                                         |
| 296         | [N;R0][c;R]1:[c;R]2:[n;R]:[c;R]([N;R0][c;R]3:[c;R]:[c;R]:[c;R]:[c;R]:[c;R]:[c;R]:3):[s;R]:[c;R]:2:[n;R]:[c;R]:[n;R]:1                      |
| 297         | [N;R0][c;R]1:[n;R]:[c;R]2:[c;R]([O;R0][c;R]3:[c;R]:[c;R]:[n;R]:[c;R]:[n;R]:3):[c;R]:[c;R]:[c;R]:[c;R]:2:[s;R]:1                            |
